# Supplementary material for: Predictors of physical activity levels in children and adolescents with cerebral palsy: clinical cohort study protocol
Source: PubMed Central journal article supplement — BMJ Open. 2021 Sep 21;11(9):e047522. doi: 10.1136/bmjopen-2020-047522 (PMC8458314; doi:10.1136/bmjopen-2020-047522), 2021-09-21
Supplement: bmjopen-2020-047522.draft_revisions.pdf [file bmjopen-2020-047522.draft_revisions.pdf]

# BMJ Open

BMJ Open is committed to open peer review. As part of this commitment we make the peer review history of every article we publish publicly available.

When an article is published we post the peer reviewers' comments and the authors' responses online. We also post the versions of the paper that were used during peer review. These are the versions that the peer review comments apply to.

The versions of the paper that follow are the versions that were submitted during the peer review process. They are not the versions of record or the final published versions. They should not be cited or distributed as the published version of this manuscript.

BMJ Open is an open access journal and the full, final, typeset and author-corrected version of record of the manuscript is available on our site with no access controls, subscription charges or pay-per-view fees (<http://bmjopen.bmj.com>).

If you have any questions on BMJ Open's open peer review process please email [info.bmjopen@bmj.com](mailto:info.bmjopen@bmj.com)

# BMJ Open

## Predictors of physical activity levels in children and adolescents with cerebral palsy: clinical cohort study protocol

|                               |                                                                                                                                                                                                                                                                                                                                                                                                                                                                                                                                                                                                                                                                                |
|-------------------------------|--------------------------------------------------------------------------------------------------------------------------------------------------------------------------------------------------------------------------------------------------------------------------------------------------------------------------------------------------------------------------------------------------------------------------------------------------------------------------------------------------------------------------------------------------------------------------------------------------------------------------------------------------------------------------------|
| Journal:                      | <i>BMJ Open</i>                                                                                                                                                                                                                                                                                                                                                                                                                                                                                                                                                                                                                                                                |
| Manuscript ID                 | bmjopen-2020-047522                                                                                                                                                                                                                                                                                                                                                                                                                                                                                                                                                                                                                                                            |
| Article Type:                 | Protocol                                                                                                                                                                                                                                                                                                                                                                                                                                                                                                                                                                                                                                                                       |
| Date Submitted by the Author: | 02-Dec-2020                                                                                                                                                                                                                                                                                                                                                                                                                                                                                                                                                                                                                                                                    |
| Complete List of Authors:     | Fonvig, Christina; Odense University Hospital, Department of Orthopaedics and Traumatology; University of Southern Denmark, Department of Clinical Research<br>Troelsen, Jens; University of Southern Denmark, Department of Sports Science and Clinical Biomechanics<br>Dunkhase-Heinl, Ulrike; Lillebælt Hospital, Department of Paediatrics<br>lauritsen, jens; Odense University Hospital, Department of Orthopaedics and Traumatology; University of Southern Denmark, Department of Clinical Research<br>Holsgaard-Larsen, A. ; University of Southern Denmark, Department of Clinical Research; Odense University Hospital, Department of Orthopaedics and Traumatology |
| Keywords:                     | Musculoskeletal disorders < ORTHOPAEDIC & TRAUMA SURGERY, Developmental neurology & neurodisability < PAEDIATRICS, EPIDEMIOLOGY                                                                                                                                                                                                                                                                                                                                                                                                                                                                                                                                                |
|                               |                                                                                                                                                                                                                                                                                                                                                                                                                                                                                                                                                                                                                                                                                |

SCHOLARONE™  
Manuscripts

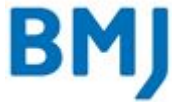

I, the Submitting Author has the right to grant and does grant on behalf of all authors of the Work (as defined in the below author licence), an exclusive licence and/or a non-exclusive licence for contributions from authors who are: i) UK Crown employees; ii) where BMJ has agreed a CC-BY licence shall apply, and/or iii) in accordance with the terms applicable for US Federal Government officers or employees acting as part of their official duties; on a worldwide, perpetual, irrevocable, royalty-free basis to BMJ Publishing Group Ltd ("BMJ") its licensees and where the relevant Journal is co-owned by BMJ to the co-owners of the Journal, to publish the Work in this journal and any other BMJ products and to exploit all rights, as set out in our [licence](#).

The Submitting Author accepts and understands that any supply made under these terms is made by BMJ to the Submitting Author unless you are acting as an employee on behalf of your employer or a postgraduate student of an affiliated institution which is paying any applicable article publishing charge ("APC") for Open Access articles. Where the Submitting Author wishes to make the Work available on an Open Access basis (and intends to pay the relevant APC), the terms of reuse of such Open Access shall be governed by a Creative Commons licence – details of these licences and which [Creative Commons](#) licence will apply to this Work are set out in our licence referred to above.

Other than as permitted in any relevant BMJ Author's Self Archiving Policies, I confirm this Work has not been accepted for publication elsewhere, is not being considered for publication elsewhere and does not duplicate material already published. I confirm all authors consent to publication of this Work and authorise the granting of this licence.

# Predictors of physical activity levels in children and adolescents with cerebral palsy: clinical cohort study protocol

Christina Esmann Fonvig, MSc.PT

Department of Orthopaedics and Traumatology, Odense University Hospital &

Department of Clinical Research, University of Southern Denmark &

OPEN, Open Patient data Explorative Network, Odense University Hospital, Odense, Denmark

Jens Troelsen, Professor, MSc, PhD, Head of Research for Active Living

Department of Sports Science and Clinical Biomechanics

University of Southern Denmark

Ulrike Dunkhase-Heinl, MD

Department of Paediatrics, Lillebaelt Hospital, Kolding

Jens Lauritsen, Professor

Department of Orthopaedics and Traumatology, Odense University Hospital &

Department of Clinical Research, University of Southern Denmark

Anders Holsgaard-Larsen, Associate Professor, MSc, PhD.

Department of Orthopaedics and Traumatology, Odense University Hospital &

Department of Clinical Research, University of Southern Denmark

## Corresponding author:

Christina Esmann Fonvig, The Orthopaedic Research Unit, Department of Orthopaedic Surgery and Traumatology, Odense University Hospital, J. B. Winsloews Vej 4, 5000 Odense C, Denmark.

E-mail: christina.esmann.fonvig@rsyd.dk

## Keywords:

Cerebral palsy, physical activity, prediction, children, adolescents

## Word count:

3709

1  
2  
3  
4  
5  
6  
7  
8  
9  
10  
11  
12  
13  
14  
15  
16  
17  
18  
19  
20  
21  
22  
23  
24  
25  
26  
27  
28  
29  
30  
31  
32  
33  
34  
35  
36  
37  
38  
39  
40  
41  
42  
43  
44  
45  
46  
47  
48  
49  
50  
51  
52  
53  
54  
55  
56  
57  
58  
59  
60

## Abstract

### Introduction

Children and adolescents with cerebral palsy may be trapped in a vicious circle of low physical fitness, resulting in deconditioning that causes a further decrease in physical activity (PA), a lower quality of life, and an increased risk of developing non-communicable diseases (NCDs). Therefore, establishing a healthy and active lifestyle during childhood is even more important for individuals with a disability. However, the factors that influence habitual PA in children and adolescents with cerebral palsy remain unknown.

The present protocol outlines a prospective cohort study with the aim of investigating potential predictors of habitual PA in children and adolescents with cerebral palsy in order to provide evidence for optimizing PA levels and associated overall health.

### Methods and analysis

This prospective cohort study will enroll participants with cerebral palsy between the ages of 8 and 15 years at Gross Motor Function Classification System (GMFCS) levels I–III. Using a modified version of the International Classification of Functioning, Disability and Health (ICF) model as a conceptual analytical framework, the analysis will be divided into six components and will provide predictors for habitual PA measured by accelerometry. The potential predictive variables are registry data on physical function (Danish Cerebral Palsy Follow Up Program [CPUP]); validated proxy-reported questionnaires on quality of life (Pediatric Quality of Life Inventory (PedsQL)), overall health, pain, and participation in daily activities (Pediatric Outcomes Data Collection Instrument (PODCI)); and supplementary questions regarding sleep, screen time, and socio-economic status.

## Ethics and dissemination

The project is approved by the Danish Data Protection Agency (19/16396) and has been declared not notifiable by the Regional Committee on Health Research Ethics, cf. Committee Act Art. 14, paragraph 1 (S-20192000-23). The study results will be published in international peer-reviewed journals, presented at international conferences, and published in a PhD dissertation.

## Trial registration

ClinicalTrials.org identifier: NCT04614207

## Article Summary

### Strength and limitations of this study

- The study will provide novel evidence that will aid identification of PA levels and patterns in children and adolescents with cerebral palsy for early intervention.
- The findings may be implemented in evidence-based PA guidelines, which currently are lacking for children and adolescents with cerebral palsy.
- Bootstrap validation will be performed to increase internal validation. Optimally, external validity of the findings should be verified in the future using an external cohort.

## Introduction

### Cerebral palsy

Cerebral palsy (CP) is a condition that describes a group of disorders (altered muscle tone, movement disorders, muscle weakness, ataxia, and rigidity) related to the development of movement and posture causing activity limitations and reduced quality of life(1). CP is a common impairment among children, with a prevalence of 2.1 per 1000 live births worldwide(2) and 2.4 per 1000 live births in Denmark(3). Cerebral palsy is attributed to non-progressive disturbances in the fetal central nervous system or in the developing infant within the first two years of life(1, 4).

Although CP is a non-progressive diagnosis, it is a lifelong condition that requires attention through most of the person's life, as impairments are constantly evolving and inhibit performance of activities and participation in daily living(1, 5).

### Physical activity

Low levels of PA are a worldwide threat to the health of children, including those with disabilities. For this reason, the World Health Organization recommends children to be moderate to vigorous physical active for at least 60 minutes per day, including muscle- and bone-strengthening activities at least three days per week(6). Although there are no specific evidence-based PA guidelines for children with cerebral palsy, it is clear that they have lower levels of PA and higher levels of time spent sedentary than their peers(7) and that their level of mobility limitation is negatively associated with their level of PA(8).

The long-term effects of reduced habitual PA and increased sedentary time include a greater risk of developing NCDs such as metabolic dysfunction, cardiovascular disease, and poor bone density.

These problems can, in turn, result in poorer overall health, reduced life expectancy, and a greater

1  
2  
3  
4 burden of disease in years of life lost to disability(9, 10). Ideally, childhood should be marked by  
5  
6 high levels of intense play and habitual PA, which, in addition to providing protective physical  
7  
8 benefits, also appear to improve mental health(11, 12).  
9  
10

## 11 12 13 **Predictors of physical activity**

14  
15  
16 In Scandinavia, healthcare professionals offer standardized clinical examinations throughout child-  
17  
18 hood using the Cerebral Palsy Follow-Up Program (CPUP), which was developed in Sweden more  
19  
20 than 20 years ago(13) and was adopted in Denmark as a National Clinical Quality Database by the  
21  
22 Danish Clinical Registries in 2015. CPUP is designed to support early detection of complications,  
23  
24 such as hip dislocation, scoliosis, and muscle contracture, as well as to improve the quality of  
25  
26 healthcare(13, 14). Danish Clinical Guidelines for physiotherapy and occupational therapy for  
27  
28 children with CP emphasize that future research should focus on the short- and long-term effects of  
29  
30 the interventions applied to improve the children's activities of daily living(15). Despite this  
31  
32 recommendation, it has not been investigated whether the standardized examinations and  
33  
34 accompanying variables of CPUP are associated with habitual PA. Thus, potential objective  
35  
36 predictors of PA can be identified through this national clinical quality database, allowing early  
37  
38 detection and potentially improved interventions.  
39  
40  
41  
42  
43  
44

45 To optimize activities of daily living and long-term health outcomes for the present population, a  
46  
47 key objective is to encourage and facilitate an increase in habitual PA and reduce the amount of  
48  
49 time spent sedentary(7). However, the current literature does not provide evidence for barriers to or  
50  
51 motivators for PA in children and adolescents with cerebral palsy. Furthermore, no studies have  
52  
53 examined the underlying reasons for altering habitual PA.  
54  
55  
56  
57  
58  
59  
60



## Aim and hypothesis

The aim of the present cohort-study is to identify and investigate potential predictors of habitual PA in children and adolescents with cerebral palsy, with the perspective of providing evidence to optimize PA levels and associated overall health.

We hypothesize that potential predictors of habitual PA can be identified through objective variables included in the CPUP database and in supplementary questionnaires on proxy-reported outcome measures, using a modified ICF model (Body Functions and Structures, Activities, Participation, Personal Factors, Environmental Factors, and Quality of Life) as a conceptual statistical framework.

## Methods and analysis

### Study design

A prospective clinical cohort study using historical registry data from CPUP and supplementary proxy-reported outcome measures will be conducted. The STROBE checklist for reporting cohort studies will be used to report the study findings(16).

### Ethics and dissemination

The project has been approved by the Danish Data Protection Agency (19/16396) and has been declared not notifiable by the Regional Committee on Health Research Ethics, cf. Committee Act Art. 14, paragraph 1 (S-20192000-23). The Danish Clinical Registries granted access to the Cerebral Palsy Follow-Up Program (CPUP) database in June 2019. The study is pre-registered at ClinicalTrials.gov; identifier: NCT04614207.

1  
2  
3  
4 The project will be conducted in accordance with the Helsinki Declaration II. Before participants  
5  
6 (parents/guardians) give their informed written consent to take part in the study, they will receive  
7  
8 written and oral information on the experimental procedure and potential risks. The families will be  
9  
10 informed that they can withdraw from the study at any time. All subject data will be treated  
11  
12 confidentially and in confidence according to the EU's General Data Protection Regulation.  
13  
14

15  
16 The study results, whether positive, negative, or inconclusive, will be published in international  
17  
18 peer-reviewed journals, presented at international conferences, and published in a PhD dissertation.  
19

20  
21 The articles and presentation will not contain any information that could lead to identification of  
22  
23 any participants.  
24  
25

## 26 27 28 **Participants & study setting**

29  
30 Participants will be recruited from the five regions of Denmark. To increase the external validity  
31  
32 and sample size of the present project, the inclusion criteria will be kept wide and will include  
33  
34 children and adolescents between the ages of 8 and 15 (a biological age where gait and mobility are  
35  
36 matured(17)) who are diagnosed with CP. The children/adolescents must be registered in the Danish  
37  
38 CPUP and classified at Gross Motor Function Classification System (GMFCS) levels I–III,  
39  
40 demonstrating an independent gait function with or without mobility devices. A flow diagram of  
41  
42 participants through the study is illustrated in Figure 1. Parents/guardians must be able to read and  
43  
44 understand Danish.  
45  
46  
47  
48  
49

### 50 51 **Figure 1. Flow diagram**

52  
53 Eligible participants will be identified through the Danish Health Data Authority, after which the  
54  
55 parents/guardians will receive written information through secure digital post (e-Boks). If  
56  
57 clarification is needed, the project manager can be contacted via telephone or e-mail. Interested  
58  
59  
60

1  
2  
3  
4 parents/guardians will consent electronically via personal link in e-Boks and will automatically be  
5  
6 forwarded the questionnaires, which will be filled out electronically. For non-responders, an e-mail  
7  
8 reminder will be sent out a total of three times. Habitual PA is to be measured using accelerometers  
9  
10 (see below for further description). Participants will receive an accelerometer via postal mail,  
11  
12 including a prepaid return envelope.  
13  
14  
15  
16  
17

## 18 **Data sources and measurements**

19  
20 Parents'/guardians' perceptions of their child's activity behavior, health status, socio-demographic  
21  
22 background, sleep, and screen habits will be collected in an electronic questionnaire. Demographic  
23  
24 characteristics (age, sex, CP type & subtype, GMFCS level) and detailed information on the  
25  
26 participants' health and physical abilities, as evaluated by healthcare professionals, will be collected  
27  
28 through CPUP (see below for further description of collected variables).  
29  
30  
31  
32

33 The patient-reported outcome measures will be entered directly into a secure web database,  
34  
35 REDCap, under Open Patient data Explorative Network (OPEN), Odense University Hospital,  
36  
37 Region of Southern Denmark(18), by the parents/guardians using a web link sent via secure digital  
38  
39 post (e-Boks). Legal values have been set where possible, to validate the entered values. All  
40  
41 collected data will be stored in OPEN Storage, merged, and analyzed at the Danish Health Data  
42  
43 Authority Research Engine.  
44  
45  
46  
47

## 48 **Quantitative variables**

### 49 **Accelerometry**

50  
51 Habitual PA will be assessed using the Axivity AX3 accelerometer. The use of an accelerometer is  
52  
53 a common method for objectively measuring PA(19), and is considered a feasible and validated  
54  
55 measure for ambulatory children and adolescents with CP(20).  
56  
57  
58  
59  
60

1  
2  
3  
4 The accelerometer is to be worn in a snug-fitting pouch in an elastic belt, strapped around the hip,  
5  
6 with the device placed on the midaxillary line at the level of the iliac crest on the child's right  
7  
8 side(19, 21). The accelerometer device is to be worn for seven successive days; five school days  
9  
10 and a weekend(22). A valid wear day will be defined as a day where the accelerometer is worn for  
11  
12 at least 8 hours between 6 a.m. and 10 p.m. on a weekday or for at least 10 hours on a weekend day.  
13  
14  
15 The minimum number of valid wear days will be four, including one weekend day(23). Non-valid  
16  
17 data will be excluded for further analysis. Parents will be asked to keep a diary recording the wear  
18  
19 time of the accelerometers. Non-wear time will be defined as time where the accelerometer is not  
20  
21 worn (e.g., when showering). Total wear time and activity counts will be processed using the open  
22  
23 source software GGIR(24). The GGIR default setting for non-wear time will be utilized. To  
24  
25 encourage wear time, parents will be encouraged to sign up for daily SMS messages about  
26  
27 reminding the child to put on the accelerometer.  
28  
29  
30

31  
32  
33 The Axivity AX3 detects movement in three directions: vertical (X), anteroposterior (Y), and  
34  
35 mediolateral (Z). The combination of these three axes allows for movement to be calculated into  
36  
37 vector magnitude (VM), with  $VM = \sqrt{X^2 + Y^2 + Z^2}$ . Vector magnitude will be calculated per  
38  
39 epoch of time in activity counts (counts per epoch of time). Sampling frequency will be set at 50 Hz  
40  
41 with a dynamic range of  $\pm 8g$ . The collected raw data will provide information on the wearer's  
42  
43 habitual PA behavior regarding acceleration of bodily movement.  
44  
45  
46

47  
48 The OMGUI v43 software will be used to set up and configure the accelerometers. The Axivity  
49  
50 AX3 raw acceleration data will be converted to ActiGraph counts using GGIR(24). The overall  
51  
52 level of PA will be expressed as average counts per day. Converting Axivity raw data to ActiGraph  
53  
54 counts will allow for comparability with typically developed children and for sub-analysis using  
55  
56 CP-specific cut-points for estimation of time spent in sedentary, light, or moderate-to-vigorous  
57  
58 intensity across the different gross motor function levels(21).  
59  
60

### **Cerebral Palsy Follow-Up Program (CPUP)**

Retrospective variables collected from the CPUP physiotherapy protocol, patient protocol, neuropsychiatric protocol, and orthopedic protocol will be used to predict the level of habitual PA. Physiotherapy assessments are reported to the database yearly for persons at GMFCS levels II and III, and biennially for persons at GMFCS level I. Assessments from the pediatricians and the orthopedic surgeons are collected respectively once before the age of 5 years and based on the child's age and gross motor function(13). Consequently, the retrospective CPUP data has been collected within the 38 months prior to assessment of PA level (see timeline, Figure 2).

### **Pediatric Quality of Life Inventory (PedsQL)**

To evaluate health-related quality of life, a linguistically validated Danish version of the Pediatric Quality of Life Inventory (PedsQL) Cerebral Palsy Module, which is specifically designed for children with CP, will be used(25). It is based upon the parents' reports and measures physical, emotional, social, and school functioning. The construct and discriminant validity of the original version have been supported by comparing the scores from children with CP with a generic measure of the same construct from children without disability(26). Satisfactory internal consistency reliability coefficients of 0.87–0.97 have been demonstrated for the PedsQL parent proxy-report for children ages 8–18(27).

### **The Pediatric Outcomes Data Collection Instrument (PODCI)**

Overall health, pain, and participation in normal daily activities will be assessed by a Danish version of the Pediatric Outcomes Data Collection Instrument (PODCI). Concurrent and discriminant validity have been assessed by comparing the Pediatric Outcomes Data Collection Instrument with other measures of health and well-being, gross motor function, and diagnostic subgroups in children with CP(28). Moderate to good test-retest reliability with ICC values of 0.71–0.97 have been reported in children with orthopedic or musculoskeletal disorders(29).

### Supplementary questions

Information regarding sleep, screen time, self-reported range of motion in the lower extremities, means of transportation to and from school, and assessment of mobility through the Functional Mobility Scale (FMS)(30) will be collected by means of a supplementary parent-reported questionnaire.

### Danish National Patient Register

For recruitment purposes, parents'/guardians' national security numbers will be applied for at the Danish National Patient Register, as will registry data on relevant hospital operations and procedures for the children/adolescents.

### Study size

The eligible national cohort comprises a total of approximately 1100 children and adolescents in Denmark in the age group of 8–15 years. Based on previous experience of participation in studies by this patient group we expect an inclusion of 300-400 children.

### Statistical methods

The World Health Organization (WHO) introduced the International Classification of Functioning, Disability and Health (ICF) in 2007 as a framework for discussing health and disability from a biopsychosocial perspective through the interaction of five components (i.e., Body Functions and Structures, Activity, Participation, Personal Factors, and Environmental Factors)(31). In 2010, Quality of Life (QoL) was integrated in a modified ICF model(32), which will be used in the current study as a statistical framework. This allows separate and combined analyses for each of the six components on the prediction of habitual PA, as measured by accelerometer, and will consequently provide data-driven knowledge about using the modified ICF model as a context for habitual PA for children and adolescents with CP.

1  
2  
3  
4 The following figure operationalizes the statistical framework by sorting included outcome  
5  
6 variables according to components in the modified ICF model.  
7  
8  
9

10  
11  
12 **Figure 2: Included predictive variables sorted into components according to the modified ICF model, including**  
13 **data collection timeline in months.**  
14  
15

## 16 17 **Analysis**

18  
19  
20 The identification of predictive factors of habitual PA in children and adolescents with cerebral  
21  
22 palsy between the ages of 8 and 15 years, will, as described above, be operationalized though a  
23  
24 statistical analysis plan using the modified ICF model as a conceptual framework (Figure 2). Using  
25  
26 a predictive model, the study aims to determine the associations between the response variable and  
27  
28 the predictive variables, with the purpose of predicting the output value for new observations given  
29  
30 their input values(33). The variable that is to be predicted (the response variable) is habitual PA,  
31  
32 represented by accelerometer counts. Regardless of the collection time of the data, all other  
33  
34 variables (Table 1) are considered prediction variables(33).  
35  
36  
37  
38  
39  
40  
41  
42  
43  
44  
45  
46  
47  
48  
49  
50  
51  
52  
53  
54  
55  
56  
57  
58  
59  
60

**Table 1: Predictive variables**

| ICF component                            | CPUP variables                                                                                                                                                                                                                                                                                                                                                                                                                                                                                                                                                                                 |                                                                                                                                                | Questionnaire variables                                                             |                                                                                                                                                                                                                                                                                                                                                                                                                                                                                                       |
|------------------------------------------|------------------------------------------------------------------------------------------------------------------------------------------------------------------------------------------------------------------------------------------------------------------------------------------------------------------------------------------------------------------------------------------------------------------------------------------------------------------------------------------------------------------------------------------------------------------------------------------------|------------------------------------------------------------------------------------------------------------------------------------------------|-------------------------------------------------------------------------------------|-------------------------------------------------------------------------------------------------------------------------------------------------------------------------------------------------------------------------------------------------------------------------------------------------------------------------------------------------------------------------------------------------------------------------------------------------------------------------------------------------------|
|                                          | <i>Continuous</i>                                                                                                                                                                                                                                                                                                                                                                                                                                                                                                                                                                              | <i>Categorical</i>                                                                                                                             | <i>Continuous</i>                                                                   | <i>Categorical</i>                                                                                                                                                                                                                                                                                                                                                                                                                                                                                    |
| <b>Body Function &amp; Structure</b>     |                                                                                                                                                                                                                                                                                                                                                                                                                                                                                                                                                                                                |                                                                                                                                                |                                                                                     |                                                                                                                                                                                                                                                                                                                                                                                                                                                                                                       |
| Range of motion in the lower extremities | Variable most associated with habitual physical activity from the following measurements (on the most affected side):<br><br>HIP<br><ul style="list-style-type: none"> <li>· Abduction</li> <li>· Flexion</li> <li>· Internal rotation</li> <li>· External rotation</li> <li>· Elys test</li> <li>· Extension</li> </ul><br>KNEE<br><ul style="list-style-type: none"> <li>· extension (hip 90° flexion)</li> <li>· extension (hip 0°)</li> </ul><br>ANKEL<br><ul style="list-style-type: none"> <li>· Dorsal flexion with flexed knee</li> <li>· Dorsal flexion with extended knee</li> </ul> | -                                                                                                                                              | -                                                                                   | Visual evaluation of range of motion for most affected side ('more' or 'less' than the depicted picture):<br><br><ul style="list-style-type: none"> <li>· HIP flexion</li> <li>· KNEE extension with opposite leg extended</li> <li>· KNEE extension with opposite leg flexed</li> <li>· ANKEL flexion with extended knee</li> <li>· ANKEL flexion with flexed knee:<br/> <ul style="list-style-type: none"> <li>a. Decreased range of motion</li> <li>b. Full range of motion</li> </ul> </li> </ul> |
| Number of hours of sleep per night       | -                                                                                                                                                                                                                                                                                                                                                                                                                                                                                                                                                                                              | -                                                                                                                                              | 1. Time in hours per day on school days.<br>2. Time in hours per day in the weekend | -                                                                                                                                                                                                                                                                                                                                                                                                                                                                                                     |
| Pain                                     | -                                                                                                                                                                                                                                                                                                                                                                                                                                                                                                                                                                                              | Y/N                                                                                                                                            | -                                                                                   | -                                                                                                                                                                                                                                                                                                                                                                                                                                                                                                     |
| Muscle tone (Modified Ashworth Scale)    | -                                                                                                                                                                                                                                                                                                                                                                                                                                                                                                                                                                                              | The absence or presence of increased muscle tone in the most affected side of the lower extremity as evaluated on the Modified Ashworth scale. | -                                                                                   | -                                                                                                                                                                                                                                                                                                                                                                                                                                                                                                     |
| BMI (body mass index)                    | Weight in kg / [Height (m)] <sup>2</sup>                                                                                                                                                                                                                                                                                                                                                                                                                                                                                                                                                       |                                                                                                                                                | -                                                                                   | -                                                                                                                                                                                                                                                                                                                                                                                                                                                                                                     |
| GMFCS level                              | -                                                                                                                                                                                                                                                                                                                                                                                                                                                                                                                                                                                              | <ul style="list-style-type: none"> <li>· I</li> <li>· II</li> <li>· III</li> </ul>                                                             | -                                                                                   | <ul style="list-style-type: none"> <li>· I</li> <li>· II</li> <li>· III</li> </ul>                                                                                                                                                                                                                                                                                                                                                                                                                    |



1  
2  
3  
4  
5  
6  
7  
8  
9  
10  
11  
12  
13  
14  
15  
16  
17  
18  
19  
20  
21  
22  
23  
24  
25  
26  
27  
28  
29  
30  
31  
32  
33  
34  
35  
36  
37  
38  
39  
40  
41  
42  
43  
44  
45  
46

| <b>Activities</b>                            |       |                                                                                                              |                                                                                     |                                                                                                                                                                                      |
|----------------------------------------------|-------|--------------------------------------------------------------------------------------------------------------|-------------------------------------------------------------------------------------|--------------------------------------------------------------------------------------------------------------------------------------------------------------------------------------|
| The Functional Mobility Score                | -     | FMS score (1-6) for:<br>· 5 meter<br>· 50 meter<br>· 500 meter                                               | -                                                                                   | FMS score (1-6) for:<br>· 5 meter<br>· 50 meter<br>· 500 meter                                                                                                                       |
| GMFM-66 Score                                | 0-100 | -                                                                                                            | -                                                                                   | -                                                                                                                                                                                    |
| Means of transport to and from school        | -     | -                                                                                                            | -                                                                                   | · Walks<br>· Bikes<br>· Transported (e.g. by car, bus, cargo bike)<br>· Other                                                                                                        |
| Hours of screen time                         | -     | -                                                                                                            | 1. Time in hours per day on school days.<br>2. Time in hours per day in the weekend | -                                                                                                                                                                                    |
| Ability to climb stairs                      | -     | 1. Climbs up stairs independently (Y/N)<br>2. Climbs down stairs independently (Y/N)                         | -                                                                                   | -                                                                                                                                                                                    |
| Bikes (bicycle, tricycle, running bike etc.) | -     | · Often (daily)<br>· Sometimes (a couple of times a week)<br>· Rarely (a couple of times a month)<br>· Never | -                                                                                   | -                                                                                                                                                                                    |
| <b>Participation</b>                         |       |                                                                                                              |                                                                                     |                                                                                                                                                                                      |
| PODCI                                        | -     | -                                                                                                            | 0-100                                                                               | -                                                                                                                                                                                    |
| Participation in physical training at school | -     | Y/N                                                                                                          | -                                                                                   | Y/N                                                                                                                                                                                  |
| Participation in recreational activities     | -     | Y/N                                                                                                          | -                                                                                   | · Swimming<br>· Horseback riding<br>· Soccer<br>· Handball<br>· Dance<br>· Strength training<br>· Gymnastics<br>· Basketball<br>· Floorball<br>· RaceRunning<br>· Nothing<br>· Other |

| Personal Factors          |            |                                                                                                                                                               |            |                                                                                                                                                                                                                                                                                                                                                                                                                                                                                                                                                                                                                                                    |
|---------------------------|------------|---------------------------------------------------------------------------------------------------------------------------------------------------------------|------------|----------------------------------------------------------------------------------------------------------------------------------------------------------------------------------------------------------------------------------------------------------------------------------------------------------------------------------------------------------------------------------------------------------------------------------------------------------------------------------------------------------------------------------------------------------------------------------------------------------------------------------------------------|
| Age                       | 8-15 years | -                                                                                                                                                             | 8-15 years | -                                                                                                                                                                                                                                                                                                                                                                                                                                                                                                                                                                                                                                                  |
| Sex                       | -          | Boy/girl                                                                                                                                                      | -          | Boy/girl                                                                                                                                                                                                                                                                                                                                                                                                                                                                                                                                                                                                                                           |
| CP classification         | -          | <ul style="list-style-type: none"> <li>· Spastic</li> <li>· Dyskinetic</li> <li>· Ataxic</li> <li>· Not classified/mixed form</li> </ul>                      | -          | -                                                                                                                                                                                                                                                                                                                                                                                                                                                                                                                                                                                                                                                  |
| Parents educational level | -          | -                                                                                                                                                             | -          | <ul style="list-style-type: none"> <li>· Primary school up to and including 6<sup>th</sup> grade</li> <li>· Primary school 7<sup>th</sup> – 10<sup>th</sup> grade</li> <li>· High school education (e.g. HTX, STX, HHX)</li> <li>· Vocational education (e.g. office and shop assistant, etc.)</li> <li>· Short higher education (e.g. market economist, police officer, etc.)</li> <li>· Medium-term higher education (e.g. teacher, educator, nurse, bachelor of political science, etc.)</li> <li>· Long higher education (e.g. master degree)</li> <li>· PhD or research training</li> <li>· Other education</li> <li>· Do not know</li> </ul> |
| Environmental Factors     |            |                                                                                                                                                               |            |                                                                                                                                                                                                                                                                                                                                                                                                                                                                                                                                                                                                                                                    |
| Residence region          | -          | 5 possible regions: <ul style="list-style-type: none"> <li>· Southern</li> <li>· Northern</li> <li>· Central</li> <li>· Zealand</li> <li>· Capital</li> </ul> | -          | -                                                                                                                                                                                                                                                                                                                                                                                                                                                                                                                                                                                                                                                  |
| Use of orthosis           | -          | Y/N                                                                                                                                                           | -          | -                                                                                                                                                                                                                                                                                                                                                                                                                                                                                                                                                                                                                                                  |
| Wheelchair use            | -          | <ul style="list-style-type: none"> <li>· Does not use</li> <li>· Is assisted</li> <li>· Operates independently</li> </ul>                                     | -          | -                                                                                                                                                                                                                                                                                                                                                                                                                                                                                                                                                                                                                                                  |
| Quality of Life           |            |                                                                                                                                                               |            |                                                                                                                                                                                                                                                                                                                                                                                                                                                                                                                                                                                                                                                    |
| PedsQL                    | -          | -                                                                                                                                                             | 0-100      | -                                                                                                                                                                                                                                                                                                                                                                                                                                                                                                                                                                                                                                                  |

To determine which variables predict the child's level of PA, multiple linear regression analysis will be performed according to the following models:

### Primary analysis

**Model 1)** Multiple linear regression analysis between accelerometer counts (response variable) and all CPUP variables within each ICF component (predictive variables).

### Secondary analysis

**Model 2a)** Backward stepwise regression with accelerometer counts as the response variable and all included CPUP variables as predictive variables. The Akaike information criterion (AIC) will be used to determine which variables to retain in the model. Resampling, as described below, will be used to address potential overfitting and to summarize the variability of selected variables(34).

**Model 2b)** Multiple linear regression analysis between accelerometer counts (response variable) and all included variables as predictive variables. This model will assess the degree of predictive strength that the questionnaire variables adds to model 1.

The coefficient of determination, adjusted R-squared, will illustrate the percentage of variance in PA that is explained by the predictive variables. The higher the coefficient, the stronger the relationship. The Root Mean Squared Error of the estimate will indicate the accuracy of the predictions. Results will be presented with an alpha of 0.05 and a 95% confidence interval.

Models will be checked using graphic inspection. Splines will be used to account for non-linear effects, and interactions will be included in the model based on relevant subject-matter knowledge.

These will be specified in detail in the statistical analysis plan.

Bootstrapping will be performed to reduce the risk of overfitting the prediction model and will thus increase internal validation(35). Missing data will be addressed using multiple imputation applied to

1  
2  
3  
4 each of the bootstrapped datasets(36). External validation can be verified using the Swedish CPUP  
5  
6 registry data; however, this will not be performed in the present study.  
7  
8

9  
10 To evaluate the significance of CPUP data collection periods relative to the time in months from the  
11  
12 measure of PA, the model will test for differences in prediction analyses between the following time  
13  
14 periods:  $0 \leq 12$  months,  $13 \leq 24$  months, and 25+ months (Figure 2).  
15  
16

17  
18 Analysis of non-responders and excluded participants will be performed to disclose potential  
19  
20 selection bias.  
21  
22

23  
24 Statistical analyses will be performed using Stata.  
25

### 26 **Additional analyses**

27  
28 Several other related analyses will be reported separately. One further study will be on a sub-group  
29  
30 of any children or adolescents who are referred for three-dimensional gait analyses as part of their  
31  
32 individualized clinical treatment plan. Another analysis will use cut-points for sedentary, light,  
33  
34 moderate, and vigorous activity for each of the three separate GMFCS levels(21) and then compare  
35  
36 sedentary behavior and PA levels of children and adolescents with CP with those of typically  
37  
38 developed children and adolescents. Finally, a qualitative study will be performed to explore the  
39  
40 daily life challenges that parents describe facing in their pursuit of helping their children with CP  
41  
42 live a physically active lifestyle.  
43  
44  
45  
46

### 47 **Adverse events**

48  
49 Measuring habitual PA by accelerometry is a non-invasive method commonly used in research and  
50  
51 has no known risks or side effects, including pain or discomfort.  
52  
53  
54  
55  
56  
57  
58  
59  
60

## Patient and public involvement statement

A pilot study was conducted during the fall of 2019 in which five families were invited to participate and then give feedback on the questionnaires, the use of the accelerometer, and the overall burden of participation. Feedback from the children and adolescents, as well as from their parents, led to minor alterations of the study design, such as the questionnaire setup, the use of a different type of elastic belt as well as eliminating the use of an additional accelerometer worn on the thigh.

Patient user groups contributed to the assessment of the project prior to funding being granted by the Elsass Foundation and the Region of Southern Denmark.

Study results are expected to be disseminated through a national interest organization for persons with cerebral palsy (e.g., articles on website, oral presentation), ensuring study results are communicated to the participants and also to a general wider patient community.

## Discussion

The present study will provide novel evidence for how to optimize PA for children and adolescents with CP. Recruitment via secure digital post should increase recruitment efficiency, as eligible parties are invited to participate without dependency on health care attendances. Due to the wide inclusion criteria, results of this study are expected to have a high level of external validity and be generalizable to other children and adolescents with CP. To ensure the internal validity of the study, selection bias will be investigated through a non-responder analysis. A high acceptance by the treating health professionals is expected, as the majority of variables of interest are already implemented in CPUP.

1  
2  
3  
4 The study findings may be implemented in evidence-based PA guidelines, which are currently  
5  
6 lacking for children with cerebral palsy, thus providing health professionals with a clinical tool for  
7  
8 treatment of cerebral palsy.  
9

## 10 11 **Limitations**

12  
13  
14 This cohort study will be subject to some methodological limitations. Primarily, the current  
15  
16 predictive regression analysis cannot determine causality between the predictive variables and the  
17  
18 level of PA endured. Thus, the findings should optimally be validated in an external cohort and/or  
19  
20 verified in randomized controlled trials. External validation of the prediction model may be  
21  
22 achieved, for example, by using the Swedish CPUP registry data; however, this validation is not a  
23  
24 part of the current protocol. Nevertheless, bootstrap validation will be performed to increase  
25  
26 internal validation(35).  
27  
28  
29

30  
31 Using registry data ensures clinically relevant data on all persons in the target group; however, it  
32  
33 also poses a risk of having data that is missing for unidentifiable reasons, which complicates the  
34  
35 handling of missing data. In this study, missing data will be addressed using imputation of the  
36  
37 missing values with the sample mean of the observed cases, which could result in biased estimates  
38  
39 because the variance of the variable may be underestimated.  
40  
41  
42

43 While the WHO definition of QOL is based on an individual's perception, proxy report by parents  
44  
45 or caregivers is often necessary in the pediatric care setting due to a child's young age and/or  
46  
47 limited ability to self-report(37). Although studies have shown that children and adolescents above  
48  
49 the age of five are capable of self-reporting perceived quality of life independently(38), this study  
50  
51 will use proxy evaluation due to the diverse cognitive abilities in the target group. Allowing for  
52  
53 differentiated evaluation (proxy-reported or self-reported) would complicate comparability.  
54  
55  
56  
57  
58  
59  
60

1  
2  
3  
4 Using tape as a means of mounting the accelerometers could potentially ensure slightly better data  
5 quality and possibly better wear compliance compared to using elastic bands(39). However,  
6 placement of the accelerometer with tape requires professional assistance, thus making the use of  
7 elastic belts a far more feasible solution. Additionally, elastic belts have been reported to be more  
8 comfortable for the user.  
9  
10  
11  
12  
13  
14

15  
16 Using only one accelerometer instead of two limits the possibility of differentiating activity  
17 types(40). However, this study will only be using one accelerometer to ensure better wear  
18 compliance among the children and adolescents.  
19  
20  
21  
22

23  
24 Recruitment of participants for this study will take place during the COVID-19 pandemic. To  
25 account for the possible impact this may have on the study, parents will be asked to evaluate the  
26 degree to which their child's physical activity level is affected by COVID-19 on a 5-point Likert  
27 scale ranging from "He/she is a lot less physically active now than before COVID-19" to "He/she is  
28 a lot more physically active now than before COVID-19." Furthermore, accelerometer data is only  
29 to be collected on days that represent everyday life, i.e., not quarantine days, holidays, or sick days.  
30  
31  
32  
33  
34  
35  
36  
37

## 38 **Conclusion**

39  
40  
41 The present protocol outlines a research project that will investigate predictors of habitual PA in  
42 children and adolescents with cerebral palsy with the perspective of optimizing PA levels and  
43 associated overall health, activities of daily living, and quality of life.  
44  
45  
46  
47

## 48 **Authors' contributions**

49  
50  
51  
52 Conceptualization and design of the study: AHL, JT, JL & CEF. First draft of manuscript: CEF.

53  
54  
55  
56 Critical revision of manuscript for important intellectual content and approval of final version: all  
57 authors.  
58  
59  
60

## Funding statement

The project is funded by the Elsass Foundation (grant number: 18-03-0097 & 18-3-0807), A.J.Andersen & Hustrus Fond (01737-0005 fhp), the Region of Southern Denmark (18/50617 & 20/14078), Familien Hede Nielsens Fond (N/A), Dagmar Marshalls Fond (5000020) and A.P.Moellers Fond (19-L-0060). These funding sources did not have a role in the design of this study and will not have any role during its execution, analyses, interpretation of the data, or decision to submit results.

## Competing interests statement

The authors declare that they have no competing interests.

## Acknowledgements

We would like to thank OPEN, Odense Patient data Explorative Network, Odense University Hospital, Odense, Denmark, for registry & data management as well as statistical support.



## References

1. Koman LA, Smith BP, Shilt JS. Cerebral palsy. *Lancet* (London, England). 2004;363(9421):1619-31.
2. Oskoui M, Coutinho F, Dykeman J, Jette N, Pringsheim T. An update on the prevalence of cerebral palsy: a systematic review and meta-analysis. *Dev Med Child Neurol*. 2013;55(6):509-19.
3. Frøslev-Friis C, Dunkhase-Heinl U, Andersen JD, Stausbøl-Grøn B, Hansen AV, Garne E. Epidemiology of cerebral palsy in Southern Denmark. *Danish medical journal*. 2015;62(1):A4990.
4. Bax M, Goldstein M, Rosenbaum P, Leviton A, Paneth N, Dan B, et al. Proposed definition and classification of cerebral palsy, April 2005. *Dev Med Child Neurol*. 2005;47(8):571-6.
5. Bell KJ, Ounpuu S, DeLuca PA, Romness MJ. Natural progression of gait in children with cerebral palsy. *J Pediatr Orthop*. 2002;22(5):677-82.
6. Global Recommendations on Physical Activity for Health. WHO Guidelines Approved by the Guidelines Review Committee. Geneva2010.
7. Carlon SL, Taylor NF, Dodd KJ, Shields N. Differences in habitual physical activity levels of young people with cerebral palsy and their typically developing peers: a systematic review. *Disability and rehabilitation*. 2013;35(8):647-55.
8. Bjornson KF, Belza B, Kartin D, Logsdon R, McLaughlin JF. Ambulatory physical activity performance in youth with cerebral palsy and youth who are developing typically. *Phys Ther*. 2007;87(3):248-57.
9. Durstine JL, Painter P, Franklin BA, Morgan D, Pitetti KH, Roberts SO. Physical activity for the chronically ill and disabled. *Sports medicine (Auckland, NZ)*. 2000;30(3):207-19.
10. Murray CJ, Vos T, Lozano R, Naghavi M, Flaxman AD, Michaud C, et al. Disability-adjusted life years (DALYs) for 291 diseases and injuries in 21 regions, 1990-2010: a systematic analysis for the Global Burden of Disease Study 2010. *Lancet* (London, England). 2012;380(9859):2197-223.
11. Fowler EG, Kolobe TH, Damiano DL, Thorpe DE, Morgan DW, Brunstrom JE, et al. Promotion of physical fitness and prevention of secondary conditions for children with cerebral palsy: section on pediatrics research summit proceedings. *Phys Ther*. 2007;87(11):1495-510.
12. Strong WB, Malina RM, Blimkie CJ, Daniels SR, Dishman RK, Gutin B, et al. Evidence based physical activity for school-age youth. *J Pediatr*. 2005;146(6):732-7.
13. Rasmussen HM, Nordbye-Nielsen K, Moller-Madsen B, Johansen M, Ellitsgaard N, Pedersen CR, et al. The Danish Cerebral Palsy Follow-up Program. *Clin Epidemiol*. 2016;8:457-60.
14. Alriksson-Schmidt A, Hagglund G, Rodby-Bousquet E, Westbom L. Follow-up of individuals with cerebral palsy through the transition years and description of adult life: the Swedish experience. *Journal of pediatric rehabilitation medicine*. 2014;7(1):53-61.
15. SST. National Klinisk Retningslinje for fysioterapi/ergoterapi til børn med cerebral parese <https://sundhedsstyrelsen.dk/da/udgivelser/2014/nkr-cerebral-parese2014> [
16. Vandembroucke JP, Elm Ev, Altman DG, Gøtzsche PC, Mulrow CD, Pocock SJ, et al. Strengthening the Reporting of Observational Studies in Epidemiology (STROBE): Explanation and Elaboration. *Annals of internal medicine*. 2007;147(8):W-163-W-94.
17. Froehle AW, Nahhas RW, Sherwood RJ, Duren DL. Age-related changes in spatiotemporal characteristics of gait accompany ongoing lower limb linear growth in late childhood and early adolescence. *Gait & posture*. 2013;38(1):14-9.
18. Harris PA, Taylor R, Thielke R, Payne J, Gonzalez N, Conde JG. Research electronic data capture (REDCap)--a metadata-driven methodology and workflow process for providing translational research informatics support. *J Biomed Inform*. 2009;42(2):377-81.
19. Arvidsson D, Fridolfsson J, Börjesson M. Measurement of physical activity in clinical practice using accelerometers. *Journal of Internal Medicine*. 2019;286(2):137-53.

20. Gorter JW, Noorduyn SG, Obeid J, Timmons BW. Accelerometry: A Feasible Method to Quantify Physical Activity in Ambulatory and Nonambulatory Adolescents with Cerebral Palsy. *International Journal of Pediatrics*. 2012;2012:6.
21. Trost SG, Fragala-Pinkham M, Lennon N, O'Neil ME. Decision Trees for Detection of Activity Intensity in Youth with Cerebral Palsy. *Med Sci Sports Exerc*. 2016;48(5):958-66.
22. Ishikawa S, Kang M, Bjornson KF, Song K. Reliably measuring ambulatory activity levels of children and adolescents with cerebral palsy. *Archives of physical medicine and rehabilitation*. 2013;94(1):132-7.
23. Cain KL, Sallis JF, Conway TL, Van Dyck D, Calhoun L. Using accelerometers in youth physical activity studies: a review of methods. *Journal of physical activity & health*. 2013;10(3):437-50.
24. Migueles J, Rowlands A, Huber F, Sabia S, van Hees V. GGIR: A Research Community-Driven Open Source R Package for Generating Physical Activity and Sleep Outcomes From Multi-Day Raw Accelerometer Data. *Journal for the Measurement of Physical Behaviour*. 2019;2:188-96.
25. Stahlhut M, Wong CTK, Taudorf K, Curtis D. Oversættelse af PedQL [in Danish]. *Fag Og Forskning*. 2010;March:4.
26. Carlon S, Shields N, Yong K, Gilmore R, Sakzewski L, Boyd R. A systematic review of the psychometric properties of Quality of Life measures for school aged children with cerebral palsy. *BMC pediatrics*. 2010;10(1):81.
27. Varni JW, Burwinkle TM, Berrin SJ, Sherman SA, Artavia K, Malcarne VL. The PedsQL in pediatric cerebral palsy: reliability, validity, and sensitivity of the Generic Core Scales and Cerebral Palsy Module. *Dev Med Child Neurol*. 2006;48.
28. McCarthy ML, Silberstein CE, Atkins EA, Harryman SE, Sponseller PD, Hadley-Miller NA. Comparing reliability and validity of pediatric instruments for measuring health and well-being of children with spastic cerebral palsy. *Dev Med Child Neurol*. 2002;44(7):468-76.
29. Harvey A, Robin J, Morris ME, Graham HK, Baker R. A systematic review of measures of activity limitation for children with cerebral palsy. *Dev Med Child Neurol*. 2008;50(3):190-8.
30. Graham HK, Harvey A, Rodda J, Nattrass GR, Pirpiris M. The Functional Mobility Scale (FMS). *J Pediatr Orthop*. 2004;24.
31. Rosenbaum P. Family and quality of life: key elements in intervention in children with cerebral palsy. *Dev Med Child Neurol*. 2011;53 Suppl 4:68-70.
32. McDougall J, Wright V, Rosenbaum P. The ICF model of functioning and disability: incorporating quality of life and human development. *Developmental neurorehabilitation*. 2010;13(3):204-11.
33. Shmueli G. To Explain or to Predict? *Statistical Science*. 2011;25.
34. Harrell FE. *Multivariable Modeling Strategies*. In: *Regression Modeling Strategies*. Springer Series in Statistics. New York, NY: Springer; 2001.
35. Austin PC, Steyerberg EW. Events per variable (EPV) and the relative performance of different strategies for estimating the out-of-sample validity of logistic regression models. *Stat Methods Med Res*. 2017;26(2):796-808.
36. Schomaker M, Heumann C. Bootstrap inference when using multiple imputation. *Stat Med*. 2018;37(14):2252-66.
37. Schiariti V, Klassen AF, Cieza A, Sauve K, O'Donnell M, Armstrong R, et al. Comparing contents of outcome measures in cerebral palsy using the International Classification of Functioning (ICF-CY): a systematic review. *Eur J Paediatr Neurol*. 2014;18(1):1-12.
38. Germain N, Aballéa S, Toumi M. Measuring the health-related quality of life in young children: how far have we come? *J Mark Access Health Policy*. 2019;7(1):1618661-.
39. Schneller MB, Bentsen P, Nielsen G, Brond JC, Ried-Larsen M, Mygind E, et al. Measuring Children's Physical Activity: Compliance Using Skin-Taped Accelerometers. *Med Sci Sports Exerc*. 2017;49(6):1261-9.

1  
2  
3  
4 40. Stewart T, Narayanan A, Hedayatrad L, Neville J, Mackay L, Duncan S. A Dual-Accelerometer  
5 System for Classifying Physical Activity in Children and Adults. Med Sci Sports Exerc. 2018;50(12):2595-602.  
6  
7  
8  
9

## 10 Captions for figures

11

12  
13 Figure 1. Flow diagram  
14

15  
16 Figure 2: Included predictive variables sorted into components according to the modified ICF  
17  
18 model, including data collection timeline in months  
19  
20  
21  
22  
23  
24  
25  
26  
27  
28  
29  
30  
31  
32  
33  
34  
35  
36  
37  
38  
39  
40  
41  
42  
43  
44  
45  
46  
47  
48  
49  
50  
51  
52  
53  
54  
55  
56  
57  
58  
59  
60

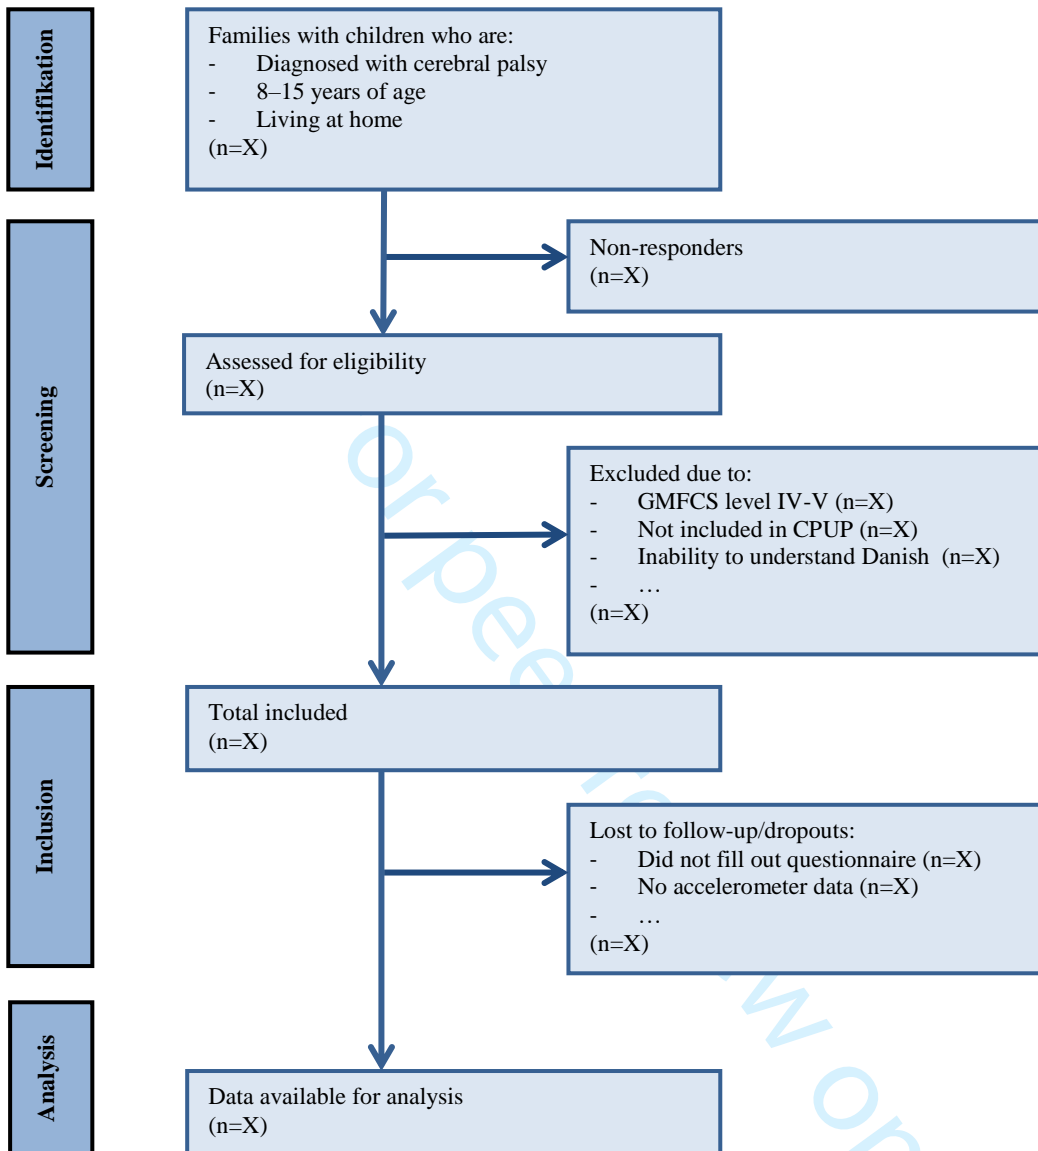

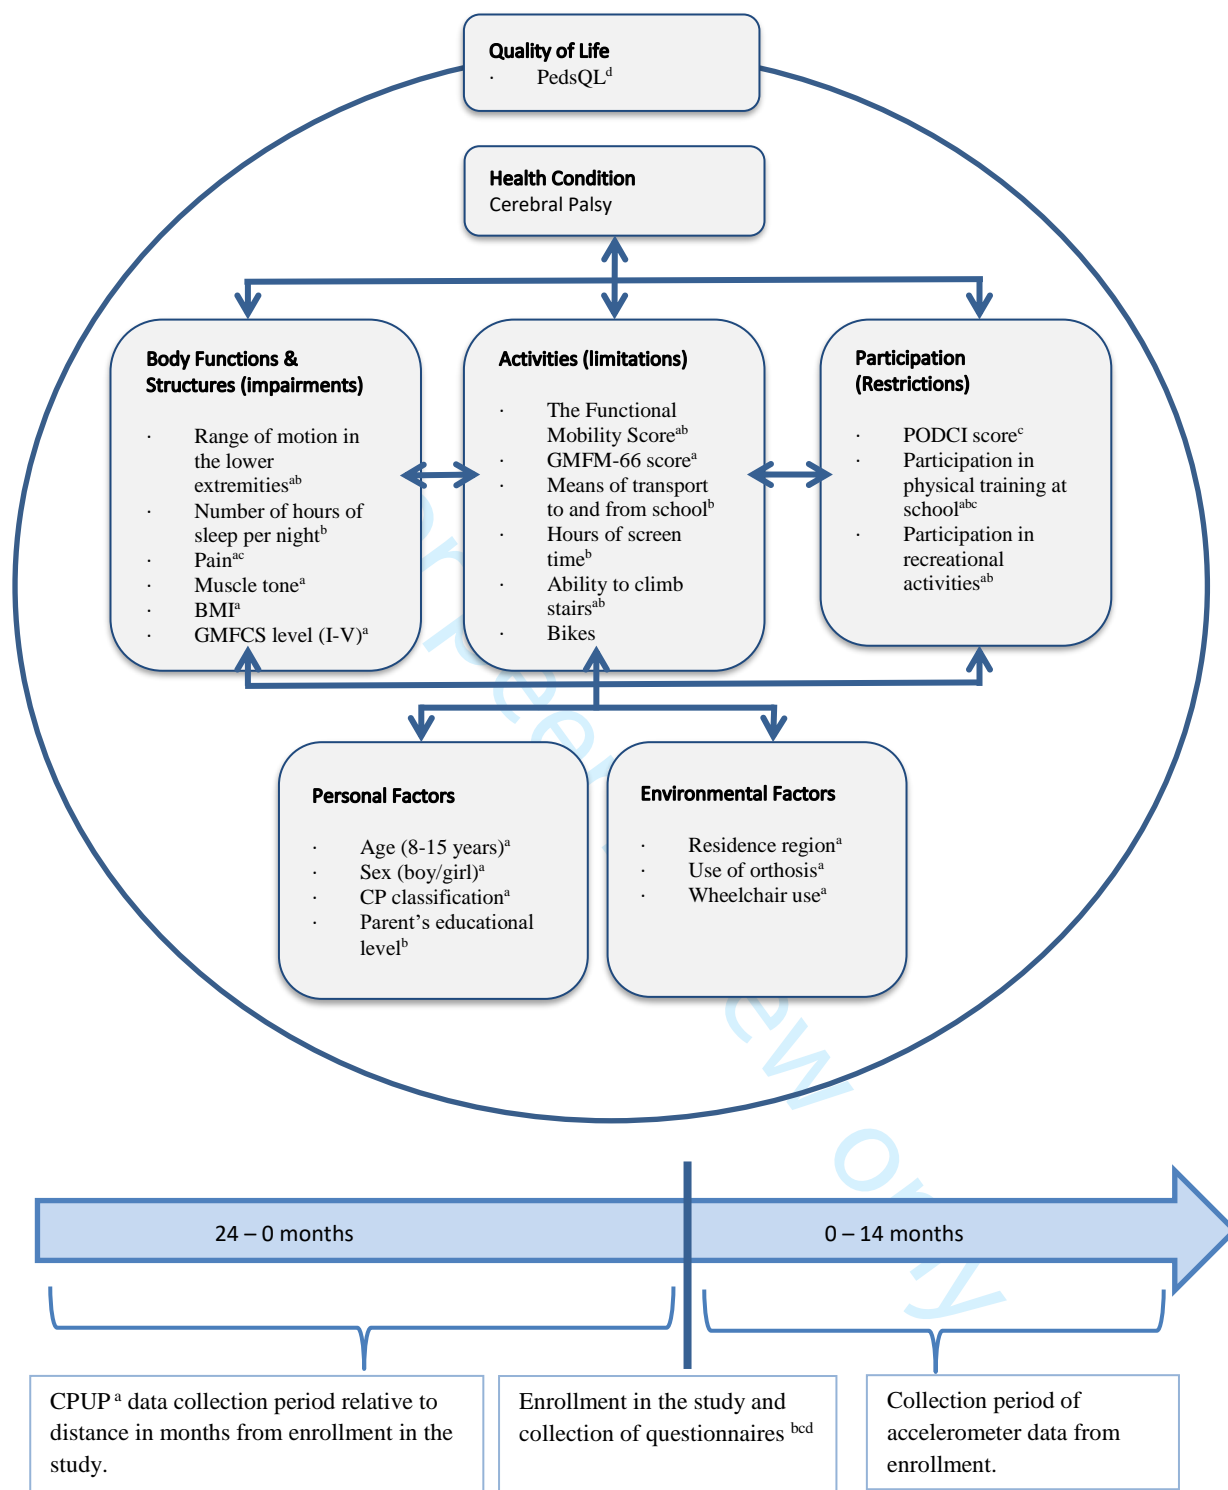

Variables derived from the following: <sup>a</sup>CPUP registry, <sup>b</sup>Parent reported questionnaire, <sup>c</sup>PODCI questionnaire, <sup>d</sup>PedsQL questionnaire

STROBE Statement—Checklist of items that should be included in reports of *cohort studies*

|                              | Item No | Recommendation                                                                                                                                                                                    | Page            |
|------------------------------|---------|---------------------------------------------------------------------------------------------------------------------------------------------------------------------------------------------------|-----------------|
| <b>Title and abstract</b>    | 1       | (a) Indicate the study's design with a commonly used term in the title or the abstract                                                                                                            | 1               |
|                              |         | (b) Provide in the abstract an informative and balanced summary of what was done and what was found                                                                                               | 2               |
| <b>Introduction</b>          |         |                                                                                                                                                                                                   |                 |
| Background/rationale         | 2       | Explain the scientific background and rationale for the investigation being reported                                                                                                              | 4-5             |
| Objectives                   | 3       | State specific objectives, including any prespecified hypotheses                                                                                                                                  | 6               |
| <b>Methods</b>               |         |                                                                                                                                                                                                   |                 |
| Study design                 | 4       | Present key elements of study design early in the paper                                                                                                                                           | 6               |
| Setting                      | 5       | Describe the setting, locations, and relevant dates, including periods of recruitment, exposure, follow-up, and data collection                                                                   | 7               |
| Participants                 | 6       | (a) Give the eligibility criteria, and the sources and methods of selection of participants. Describe methods of follow-up                                                                        | 7               |
|                              |         | (b) For matched studies, give matching criteria and number of exposed and unexposed                                                                                                               | -               |
| Variables                    | 7       | Clearly define all outcomes, exposures, predictors, potential confounders, and effect modifiers. Give diagnostic criteria, if applicable                                                          | 8-12            |
| Data sources/<br>measurement | 8*      | For each variable of interest, give sources of data and details of methods of assessment (measurement). Describe comparability of assessment methods if there is more than one group              | 8               |
| Bias                         | 9       | Describe any efforts to address potential sources of bias                                                                                                                                         | 17-19           |
| Study size                   | 10      | Explain how the study size was arrived at                                                                                                                                                         | 7               |
| Quantitative variables       | 11      | Explain how quantitative variables were handled in the analyses. If applicable, describe which groupings were chosen and why                                                                      | 12,<br>16-17    |
| Statistical methods          | 12      | (a) Describe all statistical methods, including those used to control for confounding                                                                                                             | 11-12,<br>16-17 |
|                              |         | (b) Describe any methods used to examine subgroups and interactions                                                                                                                               | 17              |
|                              |         | (c) Explain how missing data were addressed                                                                                                                                                       | 16-17           |
|                              |         | (d) If applicable, explain how loss to follow-up was addressed                                                                                                                                    | -               |
|                              |         | (e) Describe any sensitivity analyses                                                                                                                                                             | -               |
| <b>Results</b>               |         |                                                                                                                                                                                                   |                 |
| Participants                 | 13*     | (a) Report numbers of individuals at each stage of study—eg numbers potentially eligible, examined for eligibility, confirmed eligible, included in the study, completing follow-up, and analysed | Fig 1           |
|                              |         | (b) Give reasons for non-participation at each stage                                                                                                                                              | Fig 1           |
|                              |         | (c) Consider use of a flow diagram                                                                                                                                                                | Fig 1           |
| Descriptive data             | 14*     | (a) Give characteristics of study participants (eg demographic, clinical, social) and information on exposures and potential confounders                                                          | -               |
|                              |         | (b) Indicate number of participants with missing data for each variable of interest                                                                                                               | -               |
|                              |         | (c) Summarise follow-up time (eg, average and total amount)                                                                                                                                       | Fig 2           |
| Outcome data                 | 15*     | Report numbers of outcome events or summary measures over time                                                                                                                                    | -               |
| Main results                 | 16      | (a) Give unadjusted estimates and, if applicable, confounder-adjusted                                                                                                                             | -               |

|                          |    |                                                                                                                                                                            |    |
|--------------------------|----|----------------------------------------------------------------------------------------------------------------------------------------------------------------------------|----|
|                          |    | estimates and their precision (eg, 95% confidence interval). Make clear which confounders were adjusted for and why they were included                                     |    |
|                          |    | (b) Report category boundaries when continuous variables were categorized                                                                                                  | -  |
|                          |    | (c) If relevant, consider translating estimates of relative risk into absolute risk for a meaningful time period                                                           | -  |
| Other analyses           | 17 | Report other analyses done—eg analyses of subgroups and interactions, and sensitivity analyses                                                                             | -  |
| <b>Discussion</b>        |    |                                                                                                                                                                            |    |
| Key results              | 18 | Summarise key results with reference to study objectives                                                                                                                   | 18 |
| Limitations              | 19 | Discuss limitations of the study, taking into account sources of potential bias or imprecision. Discuss both direction and magnitude of any potential bias                 | 19 |
| Interpretation           | 20 | Give a cautious overall interpretation of results considering objectives, limitations, multiplicity of analyses, results from similar studies, and other relevant evidence | -  |
| Generalisability         | 21 | Discuss the generalisability (external validity) of the study results                                                                                                      | 18 |
| <b>Other information</b> |    |                                                                                                                                                                            |    |
| Funding                  | 22 | Give the source of funding and the role of the funders for the present study and, if applicable, for the original study on which the present article is based              | 21 |

\*Give information separately for exposed and unexposed groups.

**Note:** An Explanation and Elaboration article discusses each checklist item and gives methodological background and published examples of transparent reporting. The STROBE checklist is best used in conjunction with this article (freely available on the Web sites of PLoS Medicine at <http://www.plosmedicine.org/>, Annals of Internal Medicine at <http://www.annals.org/>, and Epidemiology at <http://www.epidem.com/>). Information on the STROBE Initiative is available at <http://www.strobe-statement.org>.

# BMJ Open

## Predictors of physical activity levels in children and adolescents with cerebral palsy: clinical cohort study protocol

|                                 |                                                                                                                                                                                                                                                                                                                                                                                                                                                                                                                                                                                                                                                                                |
|---------------------------------|--------------------------------------------------------------------------------------------------------------------------------------------------------------------------------------------------------------------------------------------------------------------------------------------------------------------------------------------------------------------------------------------------------------------------------------------------------------------------------------------------------------------------------------------------------------------------------------------------------------------------------------------------------------------------------|
| Journal:                        | <i>BMJ Open</i>                                                                                                                                                                                                                                                                                                                                                                                                                                                                                                                                                                                                                                                                |
| Manuscript ID                   | bmjopen-2020-047522.R1                                                                                                                                                                                                                                                                                                                                                                                                                                                                                                                                                                                                                                                         |
| Article Type:                   | Protocol                                                                                                                                                                                                                                                                                                                                                                                                                                                                                                                                                                                                                                                                       |
| Date Submitted by the Author:   | 18-Jun-2021                                                                                                                                                                                                                                                                                                                                                                                                                                                                                                                                                                                                                                                                    |
| Complete List of Authors:       | Fonvig, Christina; Odense University Hospital, Department of Orthopaedics and Traumatology; University of Southern Denmark, Department of Clinical Research<br>Troelsen, Jens; University of Southern Denmark, Department of Sports Science and Clinical Biomechanics<br>Dunkhase-Heinl, Ulrike; Lillebælt Hospital, Department of Paediatrics<br>lauritsen, jens; Odense University Hospital, Department of Orthopaedics and Traumatology; University of Southern Denmark, Department of Clinical Research<br>Holsgaard-Larsen, A. ; University of Southern Denmark, Department of Clinical Research; Odense University Hospital, Department of Orthopaedics and Traumatology |
| <b>Primary Subject Heading</b>: | Paediatrics                                                                                                                                                                                                                                                                                                                                                                                                                                                                                                                                                                                                                                                                    |
| Secondary Subject Heading:      | Public health                                                                                                                                                                                                                                                                                                                                                                                                                                                                                                                                                                                                                                                                  |
| Keywords:                       | Musculoskeletal disorders < ORTHOPAEDIC & TRAUMA SURGERY, Developmental neurology & neurodisability < PAEDIATRICS, EPIDEMIOLOGY                                                                                                                                                                                                                                                                                                                                                                                                                                                                                                                                                |
|                                 |                                                                                                                                                                                                                                                                                                                                                                                                                                                                                                                                                                                                                                                                                |

SCHOLARONE™  
Manuscripts





I, the Submitting Author has the right to grant and does grant on behalf of all authors of the Work (as defined in the below author licence), an exclusive licence and/or a non-exclusive licence for contributions from authors who are: i) UK Crown employees; ii) where BMJ has agreed a CC-BY licence shall apply, and/or iii) in accordance with the terms applicable for US Federal Government officers or employees acting as part of their official duties; on a worldwide, perpetual, irrevocable, royalty-free basis to BMJ Publishing Group Ltd ("BMJ") its licensees and where the relevant Journal is co-owned by BMJ to the co-owners of the Journal, to publish the Work in this journal and any other BMJ products and to exploit all rights, as set out in our [licence](#).

The Submitting Author accepts and understands that any supply made under these terms is made by BMJ to the Submitting Author unless you are acting as an employee on behalf of your employer or a postgraduate student of an affiliated institution which is paying any applicable article publishing charge ("APC") for Open Access articles. Where the Submitting Author wishes to make the Work available on an Open Access basis (and intends to pay the relevant APC), the terms of reuse of such Open Access shall be governed by a Creative Commons licence – details of these licences and which [Creative Commons](#) licence will apply to this Work are set out in our licence referred to above.

Other than as permitted in any relevant BMJ Author's Self Archiving Policies, I confirm this Work has not been accepted for publication elsewhere, is not being considered for publication elsewhere and does not duplicate material already published. I confirm all authors consent to publication of this Work and authorise the granting of this licence.

## PROTOCOL MANUSCRIPT

# Predictors of physical activity levels in children and adolescents with cerebral palsy: clinical cohort study protocol

Christina Esmann Fonvig, MSc.PT

Orthopaedic Research Unit,

Department of Orthopaedics and Traumatology, Odense University Hospital &

Department of Clinical Research, University of Southern Denmark

OPEN, Open Patient data Explorative Network, Odense University Hospital, Odense, Denmark

Jens Troelsen, Professor, MSc, PhD, Head of Department

Department of Sports Science and Clinical Biomechanics

University of Southern Denmark

Ulrike Dunkhase-Heinl, MD

Department of Paediatrics, Lillebaelt Hospital, Kolding

Jens Lauritsen, Professor

Department of Orthopaedics and Traumatology, Odense University Hospital &

Department of Clinical Research, University of Southern Denmark

Anders Holsgaard-Larsen, Professor, MSc, PhD.

Department of Orthopaedics and Traumatology, Odense University Hospital &

Department of Clinical Research, University of Southern Denmark

## Corresponding author:

Christina Esmann Fonvig, The Orthopaedic Research Unit, Department of Orthopaedic Surgery and Traumatology, Odense University Hospital, J. B. Winsloews Vej 4, 5000 Odense C, Denmark.

E-mail: christina.esmann.fonvig@rsyd.dk

## Keywords:

Cerebral palsy, physical activity, prediction, children, adolescents

## Word count:

4080

## PROTOCOL MANUSCRIPT

## 1 **Abstract**

### 2 **Introduction**

3 Children and adolescents with cerebral palsy may be trapped in a vicious circle of low physical  
4 fitness, resulting in deconditioning that causes a further decrease in physical activity (PA), a lower  
5 quality of life, and an increased risk of developing non-communicable diseases (NCDs). Therefore,  
6 establishing a healthy and active lifestyle during childhood is even more important for individuals  
7 with a disability. However, the factors that influence habitual PA in children and adolescents with  
8 cerebral palsy remain unknown.

9 The present protocol outlines a prospective cohort study with the aim of investigating potential  
10 predictors of habitual PA in children and adolescents with cerebral palsy in order to provide  
11 evidence for optimizing PA levels and associated overall health.

### 12 **Methods and analysis**

13 This prospective cohort study will enroll participants with cerebral palsy between the ages of 8 and  
14 15 years at Gross Motor Function Classification System (GMFCS) levels I–III. Using a modified  
15 version of the International Classification of Functioning, Disability and Health (ICF) model as a  
16 conceptual analytical framework, the analysis will be divided into six components and will provide  
17 predictors for habitual PA measured by accelerometry. The potential predictive variables are  
18 registry data on physical function (Danish Cerebral Palsy Follow Up Program [CPUP]); validated  
19 proxy-reported questionnaires on quality of life (Pediatric Quality of Life Inventory (PedsQL)),  
20 overall health, pain, and participation in daily activities (Pediatric Outcomes Data Collection  
21 Instrument (PODCI)); and supplementary questions regarding sleep, screen time, and socio-  
22 economic status.

## PROTOCOL MANUSCRIPT

## 1 **Ethics and dissemination**

2 The project is approved by the Danish Data Protection Agency (19/16396) and has been declared  
3 not notifiable by the Regional Committee on Health Research Ethics, cf. Committee Act Art. 14,  
4 paragraph 1 (S-20192000-23). The study results will be published in international peer-reviewed  
5 journals, presented at international conferences, and published in a PhD dissertation.

## 6 **Trial registration**

7 ClinicalTrials.org identifier: NCT04614207

## 8 **Article Summary**

### 9 **Strength and limitations of this study**

- 10 • The study will provide novel evidence that will aid identification of PA levels and patterns in  
11 children and adolescents with cerebral palsy for early intervention.
- 12 • The findings may be implemented in evidence-based PA guidelines, which currently are lacking  
13 for children and adolescents with cerebral palsy.
- 14 • Bootstrap validation will be performed to increase internal validation. Optimally, external  
15 validity of the findings should be verified in the future using an external cohort.

## PROTOCOL MANUSCRIPT

1  
2  
3  
4  
5  
6  
7  
8  
9  
10  
11  
12  
13  
14  
15  
16  
17  
18  
19  
20  
21  
22  
23  
24  
25  
26  
27  
28  
29  
30  
31  
32  
33  
34  
35  
36  
37  
38  
39  
40  
41  
42  
43  
44  
45  
46  
47  
48  
49  
50  
51  
52  
53  
54  
55  
56  
57  
58  
59  
60

## 1 Introduction

### 2 Cerebral palsy

3 Cerebral palsy (CP) is a condition that describes a group of disorders (altered muscle tone,  
4 movement disorders, muscle weakness, ataxia, and rigidity) related to the development of  
5 movement and posture causing activity limitations and reduced quality of life(1). CP is a common  
6 impairment among children, with a prevalence of 2.1 per 1000 live births worldwide(2) and 2.4 per  
7 1000 live births in Denmark(3). Cerebral palsy is attributed to non-progressive disturbances in the  
8 fetal central nervous system or in the developing infant within the first two years of life(1, 4).  
9 Although CP is a non-progressive diagnosis, it is a lifelong condition that requires attention through  
10 most of the person's life, as impairments are constantly evolving and inhibit performance of  
11 activities and participation in daily living(1, 5).

### 13 Physical activity

14 Low levels of physical activity (PA) are a worldwide threat to the health of children, including  
15 those with disabilities. For this reason, the World Health Organization recommends children to be  
16 moderate to vigorous physical active for at least 60 minutes per day, including muscle- and bone-  
17 strengthening activities at least three days per week(6). Although there are no specific evidence-  
18 based PA guidelines for children with cerebral palsy, it is clear that they have lower levels of PA  
19 and higher levels of time spent sedentary than their peers(7) and that their level of mobility  
20 limitation is negatively associated with their level of PA(8).

21 The long-term effects of reduced habitual PA and increased sedentary time include a greater risk of  
22 developing non-communicable diseases (NCDs) such as metabolic dysfunction, cardiovascular  
23 disease, and poor bone density. These problems can, in turn, result in poorer overall health, reduced

## PROTOCOL MANUSCRIPT

1  
2  
3  
4 1 life expectancy, and a greater burden of disease in years of life lost to disability(9, 10). Furthermore,  
5  
6 2 evidence suggests that more than 25% of adults with CP experience mobility decline, for some  
7  
8  
9 3 resulting in persistent loss of independent gait function, thus, emphasizing the importance of  
10  
11 4 maintaining a physical active lifestyle throughout childhood and adolescence(11). Ideally,  
12  
13 5 childhood should be marked by high levels of intense play and habitual PA, which, in addition to  
14  
15 6 providing protective physical benefits, also appears to improve mental health(12, 13).  
16  
17  
18 7  
19  
20

### 21 8 **Predictors of physical activity**

22  
23 9 In Scandinavia, healthcare professionals offer standardized clinical examinations throughout child-  
24  
25 10 hood using the Cerebral Palsy Follow-Up Program (CPUP), which was developed in Sweden more  
26  
27 11 than 20 years ago(14) and was adopted in Denmark as a National Clinical Quality Database by the  
28  
29 12 Danish Clinical Registries in 2015. CPUP is designed to support early detection of complications,  
30  
31 13 such as hip dislocation, scoliosis, and muscle contracture, as well as to improve the quality of  
32  
33 14 healthcare(14, 15). Danish Clinical Guidelines for physiotherapy and occupational therapy for  
34  
35 15 children with CP emphasize that future research should focus on the short- and long-term effects of  
36  
37 16 the interventions applied to improve the children's activities of daily living(16). Despite this  
38  
39 17 recommendation, it has not been investigated whether the standardized examinations and  
40  
41 18 accompanying variables of CPUP are associated with habitual PA. Thus, potential objective  
42  
43 19 predictors of PA can be identified through this national clinical quality database, allowing early  
44  
45 20 detection and potentially improved interventions.  
46  
47  
48  
49  
50

51  
52 21 To optimize activities of daily living and long-term health outcomes for the present population, a  
53  
54 22 key objective is to encourage and facilitate an increase in habitual PA and reduce the amount of  
55  
56 23 time spent sedentary(7). However, the current literature does not provide evidence for barriers to or  
57  
58  
59  
60

## PROTOCOL MANUSCRIPT

1  
2  
3  
4  
5  
6  
7  
8  
9  
10  
11  
12  
13  
14  
15  
16  
17  
18  
19  
20  
21  
22  
23  
24  
25  
26  
27  
28  
29  
30  
31  
32  
33  
34  
35  
36  
37  
38  
39  
40  
41  
42  
43  
44  
45  
46  
47  
48  
49  
50  
51  
52  
53  
54  
55  
56  
57  
58  
59  
60

1 motivators for PA in children and adolescents with cerebral palsy. Furthermore, no studies have  
2 examined the underlying reasons for altering habitual PA.

## 4 **Aim and hypothesis**

5 The aim of the present cohort-study is to identify and investigate potential predictors of habitual PA  
6 in children and adolescents with cerebral palsy, with the perspective of providing evidence to  
7 optimize PA levels and associated overall health.

8 We hypothesize that potential predictors of habitual PA can be identified through objective  
9 variables included in the CPUP database and in supplementary questionnaires on proxy-reported  
10 outcome measures, using a modified ICF model (Body Functions and Structures, Activities,  
11 Participation, Personal Factors, Environmental Factors, and Quality of Life) as a conceptual  
12 statistical framework.

## 13 **Methods and analysis**

### 14 **Study design**

15 A prospective clinical cohort study using historical registry data from CPUP and supplementary  
16 proxy-reported outcome measures will be conducted. The STROBE checklist for reporting cohort  
17 studies will be used to report the study findings(17). Enrollment commenced November 3<sup>rd</sup> 2020  
18 and is expected to end by December 2021.

### 20 **Ethics and dissemination**

21 The project has been approved by the Danish Data Protection Agency (19/16396) and has been  
22 declared not notifiable by the Regional Committee on Health Research Ethics, cf. Committee Act  
23 Art. 14, paragraph 1 (S-20192000-23). The Danish Clinical Registries granted access to the

## PROTOCOL MANUSCRIPT

1  
2  
3  
4 1 Cerebral Palsy Follow-Up Program (CPUP) database in June 2019. The study is pre-registered at  
5  
6 2 ClinicalTrials.gov; identifier: NCT04614207.  
7  
8  
9

10 3 The project will be conducted in accordance with the Helsinki Declaration II. Before participants  
11  
12 4 (parents/guardians) give their informed written consent to take part in the study, they will receive  
13  
14 5 written and oral information on the experimental procedure and potential risks. The families will be  
15  
16 6 informed that they can withdraw from the study at any time. All subject data will be treated  
17  
18 7 confidentially and in confidence according to the EU's General Data Protection Regulation.  
19  
20

21 8 The study results, whether positive, negative, or inconclusive, will be published in international  
22  
23 9 peer-reviewed journals, presented at international conferences, and published in a PhD dissertation.  
24  
25

26 10 The articles and presentation will not contain any information that could lead to identification of  
27  
28 11 any participants.  
29  
30  
31  
32

### 33 13 **Participants & study setting**

34  
35  
36 14 Participants will be recruited from the five regions of Denmark.  
37

38 15 To increase the external validity and sample size of the present project, the inclusion criteria will  
39  
40 16 include children and adolescents of 8-15 years (born between 01.01.2003 - 31.12.2013) who are  
41  
42 17 diagnosed with CP. Inclusion via invitation commenced November 3<sup>rd</sup> 2020.  
43  
44

45 18 . The children/adolescents must be registered in the Danish CPUP and classified at Gross Motor  
46  
47 19 Function Classification System (GMFCS) levels I–III, demonstrating an independent gait function  
48  
49 20 with or without mobility devices. A flow diagram of participants through the study is illustrated in  
50  
51 21 Figure 1. Parents/guardians must be able to read and understand Danish.  
52  
53  
54  
55

56 23 **Figure 1. Flow diagram**  
57  
58  
59  
60



## PROTOCOL MANUSCRIPT

1  
2  
3  
4  
5  
6  
7  
8  
9  
10  
11  
12  
13  
14  
15  
16  
17  
18  
19  
20  
21  
22  
23  
24  
25  
26  
27  
28  
29  
30  
31  
32  
33  
34  
35  
36  
37  
38  
39  
40  
41  
42  
43  
44  
45  
46  
47  
48  
49  
50  
51  
52  
53  
54  
55  
56  
57  
58  
59  
60

1 Eligible participants will be identified through the Danish Health Data Authority, after which the  
2 parents/guardians will receive written information through secure digital post (e-Boks). If  
3 clarification is needed, the project manager can be contacted via telephone or e-mail. Interested  
4 parents/guardians will consent electronically via personal link in e-Boks and will automatically be  
5 forwarded the questionnaires, which will be filled out electronically. For non-responders, an e-mail  
6 reminder will be sent out a total of three times. Habitual PA is to be measured using accelerometers  
7 (see below for further description). Participants will receive an accelerometer via postal mail,  
8 including a prepaid return envelope.

9

### 10 **Data sources and measurements**

11 Parents'/guardians' perceptions of their child's activity behavior, health status, socio-demographic  
12 background, sleep, and screen habits will be collected in an electronic questionnaire. Demographic  
13 characteristics (age, sex, CP type & subtype, GMFCS level) and detailed information on the  
14 participants' health and physical abilities, as evaluated by healthcare professionals, will be collected  
15 through CPUP (see below for further description of collected variables).

16 The patient-reported outcome measures will be entered directly into a secure web database,  
17 REDCap, under Open Patient data Explorative Network (OPEN), Odense University Hospital,  
18 Region of Southern Denmark(18), by the parents/guardians using a web link sent via secure digital  
19 post (e-Boks). Legal values have been set where possible, to validate the entered values. All  
20 collected data will be stored in OPEN Storage, merged, and analyzed at the Danish Health Data  
21 Authority Research Engine.

## PROTOCOL MANUSCRIPT

## 1 Quantitative variables

### 2 Accelerometry

3 Habitual PA will be assessed using the Axivity AX3 accelerometer. The use of an accelerometer is  
4 a common method for objectively measuring PA(19), and is considered a feasible and validated  
5 measure for ambulatory children and adolescents with CP(20).

6 The Axivity AX3 detects movement in three directions: vertical (X), anteroposterior (Y), and  
7 mediolateral (Z). The combination of these three axes allows for movement to be calculated into  
8 vector magnitude (VM), with  $VM = \sqrt{X^2 + Y^2 + Z^2}$ . Vector magnitude will be calculated per  
9 epoch of time in activity counts (counts per epoch of time). Sampling frequency will be set at 50 Hz  
10 with a dynamic range of  $\pm 8g$ (21). The collected raw data will provide information on the wearer's  
11 habitual PA behavior regarding acceleration of bodily movement.

12 The accelerometer is to be worn in a snug-fitting pouch in an elastic belt, strapped around the hip,  
13 with the device placed on the midaxillary line at the level of the iliac crest on the child's right  
14 side(19, 22). The accelerometer device is to be worn for seven successive days; five school days  
15 and a weekend(23). A valid wear day will be defined as a day where the accelerometer is worn for  
16 at least 10 hours out of the expected awake time (defined as hours between 6 a.m. and 10 p.m. on  
17 weekdays, and 7 a.m. and 11:59 p.m. on weekend days). A similar method has been used in the  
18 study by Rasmussen et al. (2020) to assess non-sedentary time with screen time use(21). The  
19 minimum number of valid wear days will be four, including one weekend day(24). According to  
20 procedures used in previous studies(21) non-wear periods are identified and registered as missing  
21 data by evaluating three signal features generated from acceleration in combination with  
22 temperature and predefined expected awake time. Periods of no movement (acceleration below  
23 20 mg) will be identified as non-wear depending on the timespan; 1) periods longer than 120 min

## PROTOCOL MANUSCRIPT

1  
2  
3  
4  
5  
6  
7  
8  
9  
10  
11  
12  
13  
14  
15  
16  
17  
18  
19  
20  
21  
22  
23  
24  
25  
26  
27  
28  
29  
30  
31  
32  
33  
34  
35  
36  
37  
38  
39  
40  
41  
42  
43  
44  
45  
46  
47  
48  
49  
50  
51  
52  
53  
54  
55  
56  
57  
58  
59  
60

1 will always be identified as non-wear, 2) periods from 45 to 120 min are identified as non-wear if  
2 the average temperature is below an individually estimated non-moving temperature (NMT)  
3 threshold, 3) periods of 10 to 45 min with no movement are only identified as non-wear if the  
4 average temperature is below the NMT threshold and if the end of the period is within the expected  
5 awake time. Device transportation (registration of movement when the device is not worn by the  
6 child) is identified as non-wear if the average temperature of the period is below the NMT  
7 threshold(21). Non-valid data will be excluded for further analysis.

8 Total wear time and activity counts will be processed using Matlab (Mathworks Inc., Natick,  
9 Massachusetts, US). To optimize wear time, parents will be offered a daily SMS message  
10 encouraging the child to wear the accelerometer.

11 The OMGUI v43 software will be used to set up and configure the accelerometers. The Axivity  
12 AX3 raw acceleration data will be converted to ActiGraph counts using the methods described by  
13 Brønd et al. (25). The overall level of PA will be expressed as average counts per day. Converting  
14 Axivity raw data to ActiGraph counts will allow for comparability with typically developed  
15 children and for sub-analysis using CP-specific cut-points for estimation of time spent in sedentary,  
16 light, or moderate-to-vigorous intensity across the different gross motor function levels(22).

### 17 **Cerebral Palsy Follow-Up Program (CPUP)**

18 Retrospective variables collected from the CPUP physiotherapy protocol, patient protocol,  
19 neuropsychiatric protocol, and orthopedic protocol will be used to predict the level of habitual PA.  
20 Physiotherapy assessments are reported to the database yearly for persons at GMFCS levels II and  
21 III, and biennially for persons at GMFCS level I. Assessments from the pediatricians and the  
22 orthopedic surgeons are collected respectively once before the age of 5 years and based on the

## PROTOCOL MANUSCRIPT

1 child's age and gross motor function(14). Consequently, the retrospective CPUP data has been  
2 collected within the 38 months prior to assessment of PA level (see timeline, Figure 2).

### 3 **Pediatric Quality of Life Inventory (PedsQL)**

4 To evaluate health-related quality of life, a linguistically validated Danish version of the Pediatric  
5 Quality of Life Inventory (PedsQL) Cerebral Palsy Module, which is specifically designed for  
6 children with CP, will be used(26). It is based upon the parents' reports and measures physical,  
7 emotional, social, and school functioning. The construct and discriminant validity of the original  
8 version have been supported by comparing the scores from children with CP with a generic measure  
9 of the same construct from children without disability(27). Satisfactory internal consistency  
10 reliability coefficients of 0.87–0.97 have been demonstrated for the PedsQL parent proxy-report for  
11 children ages 8–18(28).

### 12 **The Pediatric Outcomes Data Collection Instrument (PODCI)**

13 Overall health, pain, and participation in normal daily activities will be assessed by a Danish  
14 version of the Pediatric Outcomes Data Collection Instrument (PODCI). Concurrent and  
15 discriminant validity have been assessed by comparing the Pediatric Outcomes Data Collection  
16 Instrument with other measures of health and well-being, gross motor function, and diagnostic  
17 subgroups in children with CP(29). Moderate to good test-retest reliability with ICC values of 0.71–  
18 0.97 have been reported in children with orthopedic or musculoskeletal disorders(30).

### 19 **Supplementary questions**

20 The following assessment will be evaluated by means of a supplementary parent-reported  
21 questionnaire: The child's average sleep and screen time on a typical weekday and weekend-day,  
22 and parent's socio-economic status as determined by the parent (based on questionnaires used in the  
23 PHASER study)(31). Visual evaluation of range of motion for the joint on the most affected side;

## PROTOCOL MANUSCRIPT

1  
2  
3  
4  
5  
6  
7  
8  
9  
10  
11  
12  
13  
14  
15  
16  
17  
18  
19  
20  
21  
22  
23  
24  
25  
26  
27  
28  
29  
30  
31  
32  
33  
34  
35  
36  
37  
38  
39  
40  
41  
42  
43  
44  
45  
46  
47  
48  
49  
50  
51  
52  
53  
54  
55  
56  
57  
58  
59  
60

1 the parent is shown a picture of a joint movement (positioned in the minimum range of motion  
2 considered acceptable according to the CPUP's physiotherapy protocol) (32), and is asked to  
3 evaluate whether the child's joint is capable of 'more' or 'less' movement than the depicted picture  
4 (see Appendix – Parent-evaluated range of motion in the lower extremity). Furthermore, assessment  
5 of mobility through the Functional Mobility Scale (FMS)(33) (for more detail see Table 1).

6 All data from the PedsQL, PODCI and supplementary questionnaires are proxy-reported by a parent  
7 or caregiver.

### 8 **Danish National Patient Register**

9 For recruitment purposes, parents'/guardians' national security numbers will be applied for at the  
10 Danish National Patient Register, as will registry data on relevant hospital operations and  
11 procedures for the children/adolescents.

### 12 **Study size**

13 The eligible national cohort comprises a total of approximately 1100 children and adolescents in  
14 Denmark in the age group of 8–15 years. Based on previous experience of participation in studies  
15 by this patient group we expect an inclusion of 300-400 children.

### 16 **Statistical methods**

17 The World Health Organization (WHO) introduced the International Classification of Functioning,  
18 Disability and Health (ICF) in 2007 as a framework for discussing health and disability from a  
19 biopsychosocial perspective through the interaction of five components (i.e., Body Functions and  
20 Structures, Activity, Participation, Personal Factors, and Environmental Factors)(34). In 2010,  
21 Quality of Life (QoL) was integrated in a modified ICF model(35), which will be used in the  
22 current study as a statistical framework. This allows separate and combined analyses for each of the  
23 six components on the prediction of habitual PA, as measured by accelerometer, and will

## PROTOCOL MANUSCRIPT

1  
2  
3  
4 1 consequently provide data-driven knowledge about using the modified ICF model as a context for  
5  
6 2 habitual PA for children and adolescents with CP.  
7  
8

9  
10 3 The following figure operationalizes the statistical framework by sorting included outcome  
11  
12 4 variables according to components in the modified ICF model.  
13  
14

15 5

16  
17  
18 6 **Figure 2: Included predictive variables sorted into components according to the modified ICF model, including**  
19  
20 7 **data collection timeline in months.**  
21

## 22 8 **Analysis**

23  
24  
25 9 The identification of predictive factors of habitual PA in children and adolescents with cerebral  
26  
27 10 palsy between the ages of 8 and 15 years, will, as described above, be operationalized through a  
28  
29 11 statistical analysis plan using the modified ICF model as a conceptual framework (Figure 2). Using  
30  
31 12 a predictive model, the study aims to determine the associations between the response variable and  
32  
33 13 the predictive variables, with the purpose of predicting the output value for new observations given  
34  
35 14 their input values(36). The variable that is to be predicted (the response variable) is habitual PA,  
36  
37 15 represented by accelerometer counts. Regardless of the collection time of the data, all other  
38  
39 16 variables (Table 1) are considered prediction variables(36).  
40  
41  
42  
43  
44  
45  
46  
47  
48  
49  
50  
51  
52  
53  
54  
55  
56  
57  
58  
59  
60

## PROTOCOL MANUSCRIPT

Table 1: Predictive variables

|                           | ICF component                                | CPUP variables                                                                                                                                                                                                                                                                                                                                                                                                                                                                                                                                                                                                                                         | Questionnaire variables                                                                                                                                                                                                                                                                                                                                                                                                                                                                                                                                                      |
|---------------------------|----------------------------------------------|--------------------------------------------------------------------------------------------------------------------------------------------------------------------------------------------------------------------------------------------------------------------------------------------------------------------------------------------------------------------------------------------------------------------------------------------------------------------------------------------------------------------------------------------------------------------------------------------------------------------------------------------------------|------------------------------------------------------------------------------------------------------------------------------------------------------------------------------------------------------------------------------------------------------------------------------------------------------------------------------------------------------------------------------------------------------------------------------------------------------------------------------------------------------------------------------------------------------------------------------|
| Body Function & Structure | Range of motion in the lower extremities     | <p><i>Continuous value:</i><br/>Variable most associated with habitual physical activity from the following measurements (on the most affected side) measured in degrees:</p> <p>HIP</p> <ul style="list-style-type: none"> <li>· Abduction</li> <li>· Flexion</li> <li>· Internal rotation</li> <li>· External rotation</li> <li>· Ely's test</li> <li>· Extension</li> </ul> <p>KNEE</p> <ul style="list-style-type: none"> <li>· extension (hip 90° flexion)</li> <li>· extension (hip 0°)</li> </ul> <p>ANKLE</p> <ul style="list-style-type: none"> <li>· Dorsal flexion with flexed knee</li> <li>· Dorsal flexion with extended knee</li> </ul> | Visual evaluation of range of motion for most affected side. <i>Categorical values:</i> 'more' or 'less' than the depicted picture of the following joints (see appendix for illustrations): <ul style="list-style-type: none"> <li>· HIP flexion</li> <li>· KNEE extension with opposite leg extended</li> <li>· KNEE extension with opposite leg flexed</li> <li>· ANKLE flexion with extended knee</li> <li>· ANKLE flexion with flexed knee: <ol style="list-style-type: none"> <li>a. Decreased range of motion</li> <li>b. Full range of motion</li> </ol> </li> </ul> |
|                           | Number of hours of sleep per night           |                                                                                                                                                                                                                                                                                                                                                                                                                                                                                                                                                                                                                                                        | <p><i>Continuous value:</i></p> <ol style="list-style-type: none"> <li>1. Time in hours per day on school days.</li> <li>2. Time in hours per day in the weekend</li> </ol>                                                                                                                                                                                                                                                                                                                                                                                                  |
|                           | Pain                                         | <p><i>Categorical values:</i><br/>Yes/No</p>                                                                                                                                                                                                                                                                                                                                                                                                                                                                                                                                                                                                           |                                                                                                                                                                                                                                                                                                                                                                                                                                                                                                                                                                              |
|                           | Muscle tone (Modified Ashworth Scale)        | <p><i>Categorical value:</i><br/>The absence or presence of increased muscle tone in the most affected side of the lower extremity as evaluated on the Modified Ashworth scale.</p>                                                                                                                                                                                                                                                                                                                                                                                                                                                                    |                                                                                                                                                                                                                                                                                                                                                                                                                                                                                                                                                                              |
|                           | BMI (body mass index)                        | <p><i>Continuous value:</i><br/><math>\text{Weight in kg} / [\text{Height (m)}]^2</math></p>                                                                                                                                                                                                                                                                                                                                                                                                                                                                                                                                                           |                                                                                                                                                                                                                                                                                                                                                                                                                                                                                                                                                                              |
|                           | GMFCS level                                  | <p><i>Categorical values:</i><br/>I-III</p>                                                                                                                                                                                                                                                                                                                                                                                                                                                                                                                                                                                                            | <p><i>Categorical values:</i><br/>I-III</p>                                                                                                                                                                                                                                                                                                                                                                                                                                                                                                                                  |
| Activities                | The Functional Mobility Score                | <p><i>Categorical values:</i><br/>FMS score (1-6) for:</p> <ul style="list-style-type: none"> <li>· 5 meter</li> <li>· 50 meter</li> <li>· 500 meter</li> </ul>                                                                                                                                                                                                                                                                                                                                                                                                                                                                                        | <p><i>Categorical values</i><br/>FMS score (1-6) for:</p> <ul style="list-style-type: none"> <li>· 5 meter</li> <li>· 50 meter</li> <li>· 500 meter</li> </ul>                                                                                                                                                                                                                                                                                                                                                                                                               |
|                           | GMFM-66 Score                                | <p><i>Continuous score:</i><br/>0-100</p>                                                                                                                                                                                                                                                                                                                                                                                                                                                                                                                                                                                                              |                                                                                                                                                                                                                                                                                                                                                                                                                                                                                                                                                                              |
|                           | Means of transport to and from school        |                                                                                                                                                                                                                                                                                                                                                                                                                                                                                                                                                                                                                                                        | <p><i>Categorical values:</i></p> <ul style="list-style-type: none"> <li>· Walks</li> <li>· Bikes</li> <li>· Transported (e.g. by car, bus, cargo bike)</li> <li>· Other</li> </ul>                                                                                                                                                                                                                                                                                                                                                                                          |
|                           | Hours of screen time                         |                                                                                                                                                                                                                                                                                                                                                                                                                                                                                                                                                                                                                                                        | <p><i>Continuous value:</i></p> <ol style="list-style-type: none"> <li>1. Time in hours per day on school days.</li> <li>2. Time in hours per day in the weekend</li> </ol>                                                                                                                                                                                                                                                                                                                                                                                                  |
|                           | Ability to climb stairs                      | <p><i>Categorical values:</i></p> <ol style="list-style-type: none"> <li>1. Climbs up stairs independently (Yes/No)</li> <li>2. Climbs down stairs independently (Yes/No)</li> </ol>                                                                                                                                                                                                                                                                                                                                                                                                                                                                   |                                                                                                                                                                                                                                                                                                                                                                                                                                                                                                                                                                              |
|                           | Bikes (bicycle, tricycle, running bike etc.) | <p><i>Categorical values:</i></p> <ul style="list-style-type: none"> <li>· Often (daily)</li> <li>· Sometimes (a couple of times a week)</li> </ul>                                                                                                                                                                                                                                                                                                                                                                                                                                                                                                    |                                                                                                                                                                                                                                                                                                                                                                                                                                                                                                                                                                              |

PROTOCOL MANUSCRIPT

|                              |                                              |                                                                                                                                                                                                                                                  |                                                                                                                                                                                                                                                                                                                                                                                                                                                                                                                                                                                                                                                                               |
|------------------------------|----------------------------------------------|--------------------------------------------------------------------------------------------------------------------------------------------------------------------------------------------------------------------------------------------------|-------------------------------------------------------------------------------------------------------------------------------------------------------------------------------------------------------------------------------------------------------------------------------------------------------------------------------------------------------------------------------------------------------------------------------------------------------------------------------------------------------------------------------------------------------------------------------------------------------------------------------------------------------------------------------|
|                              |                                              | <ul style="list-style-type: none"> <li>· Rarely (a couple of times a month)</li> <li>· Never</li> </ul>                                                                                                                                          |                                                                                                                                                                                                                                                                                                                                                                                                                                                                                                                                                                                                                                                                               |
| <b>Participation</b>         | PODCI                                        |                                                                                                                                                                                                                                                  | <i>Continuous score:</i><br>0-100                                                                                                                                                                                                                                                                                                                                                                                                                                                                                                                                                                                                                                             |
|                              | Participation in physical training at school | <i>Categorical values:</i><br>Yes/No                                                                                                                                                                                                             | <i>Categorical values:</i><br>Yes/No                                                                                                                                                                                                                                                                                                                                                                                                                                                                                                                                                                                                                                          |
|                              | Participation in recreational activities     | <i>Categorical values:</i><br>Yes/No                                                                                                                                                                                                             | <i>Categorical values:</i> <ul style="list-style-type: none"> <li>· Swimming</li> <li>· Horseback riding</li> <li>· Soccer</li> <li>· Handball</li> <li>· Dance</li> <li>· Strength training</li> <li>· Gymnastics</li> <li>· Basketball</li> <li>· Floorball</li> <li>· RaceRunning</li> <li>· Nothing</li> <li>· Other</li> </ul>                                                                                                                                                                                                                                                                                                                                           |
| <b>Personal Factors</b>      | Age                                          | Age in years                                                                                                                                                                                                                                     | Age in years                                                                                                                                                                                                                                                                                                                                                                                                                                                                                                                                                                                                                                                                  |
|                              | Sex                                          | <i>Categorical values:</i><br>Male/Female                                                                                                                                                                                                        | <i>Categorical values:</i><br>Male/Female                                                                                                                                                                                                                                                                                                                                                                                                                                                                                                                                                                                                                                     |
|                              | CP classification                            | <i>Categorical values:</i> <ul style="list-style-type: none"> <li>· Spastic</li> <li>· Dyskinetic</li> <li>· Ataxic</li> <li>· Not classified/mixed form</li> </ul>                                                                              |                                                                                                                                                                                                                                                                                                                                                                                                                                                                                                                                                                                                                                                                               |
|                              | Parents educational level                    |                                                                                                                                                                                                                                                  | <i>Categorical values:</i> <ul style="list-style-type: none"> <li>· Primary school up to and including 6<sup>th</sup> grade</li> <li>· Primary school 7<sup>th</sup> – 10<sup>th</sup> grade</li> <li>· High school education (e.g. HTX, STX, HHX)</li> <li>· Vocational education (e.g. office and shop assistant, etc.)</li> <li>· Short higher education (e.g. market economist, police officer, etc.)</li> <li>· Medium-term higher education (e.g. teacher, educator, nurse, bachelor of political science, etc.)</li> <li>· Long higher education (e.g. master degree)</li> <li>· PhD or research training</li> <li>· Other education</li> <li>· Do not know</li> </ul> |
| <b>Environmental Factors</b> | Residence region                             | <i>Categorical values:</i> <ul style="list-style-type: none"> <li>· Region of Southern Denmark</li> <li>· Region of Northern Denmark</li> <li>· Central Denmark Region</li> <li>· Region Zealand</li> <li>· Capital Region of Denmark</li> </ul> |                                                                                                                                                                                                                                                                                                                                                                                                                                                                                                                                                                                                                                                                               |
|                              | Use of orthosis                              | <i>Categorical values:</i><br>Yes/No                                                                                                                                                                                                             |                                                                                                                                                                                                                                                                                                                                                                                                                                                                                                                                                                                                                                                                               |
|                              | Wheelchair use                               | <i>Categorical values:</i> <ul style="list-style-type: none"> <li>· Does not use</li> <li>· Is assisted</li> <li>· Operates independently</li> </ul>                                                                                             |                                                                                                                                                                                                                                                                                                                                                                                                                                                                                                                                                                                                                                                                               |
| <b>Quality of Life</b>       | PedsQL                                       |                                                                                                                                                                                                                                                  | <i>Continuous score:</i><br>0-100                                                                                                                                                                                                                                                                                                                                                                                                                                                                                                                                                                                                                                             |



## PROTOCOL MANUSCRIPT

1  
2  
3  
4 1 To determine which variables predict the child's level of PA, multiple linear regression analysis  
5  
6 2 will be performed according to the following models:

7  
8  
9  
10 3 **Primary analysis**

11  
12 4 **Model 1)** Multiple linear regression analysis between accelerometer counts (response variable) and  
13  
14 5 all CPUP variables within each ICF component (predictive variables).

15  
16  
17 6 **Secondary analysis**

18  
19  
20 7 **Model 2a)** Backward stepwise regression with accelerometer counts as the response variable and all  
21  
22 8 included CPUP variables as predictive variables. The Akaike information criterion (AIC) will be  
23  
24 9 used to determine which variables to retain in the model. Resampling, as described below, will be  
25  
26 10 used to address potential overfitting and to summarize the variability of selected variables(37).

27  
28  
29  
30 11 **Model 2b)** Multiple linear regression analysis between accelerometer counts (response variable)  
31  
32 12 and all included variables as predictive variables. This model will assess the degree of predictive  
33  
34 13 strength that the questionnaire variables adds to model 1.

35  
36  
37 14 The coefficient of determination, adjusted R-squared, will illustrate the percentage of variance in  
38  
39 15 PA that is explained by the predictive variables. The higher the coefficient, the stronger the  
40  
41 16 relationship. The Root Mean Squared Error of the estimate will indicate the accuracy of the  
42  
43 17 predictions. Results will be presented with an alpha of 0.05 and a 95% confidence interval.

44  
45  
46  
47 18 Models will be checked using graphic inspection. Splines will be used to account for non-linear  
48  
49 19 effects, and interactions will be included in the model based on relevant subject-matter knowledge.

50  
51  
52 20 These will be specified in detail in the statistical analysis plan.

53  
54  
55 21 Bootstrapping will be performed to reduce the risk of overfitting the prediction model and will thus  
56  
57 22 increase internal validation(38). Missing data will be addressed using multiple imputation applied to  
58  
59  
60

## PROTOCOL MANUSCRIPT

1  
2  
3  
4 1 each of the bootstrapped datasets(39). External validation can be verified using the Swedish CPUP  
5  
6 2 registry data; however, this will not be performed in the present study.  
7  
8

9  
10 3 To evaluate the significance of CPUP data collection periods relative to the time in months from the  
11  
12 4 measure of PA, the model will test for differences in prediction analyses between the following time  
13  
14 5 periods:  $0 \leq 12$  months,  $13 \leq 24$  months, and 25+ months (Figure 2).  
15  
16

17 6 Analysis of non-responders and excluded participants will be performed to disclose potential  
18  
19 7 selection bias.  
20  
21

22  
23 8 Statistical analyses will be performed using Stata.  
24  
25

### 26 9 **Additional analyses**

27  
28 10 Several other related analyses will be reported separately. One further study will be on a sub-group  
29  
30 11 of any children or adolescents who are referred for three-dimensional gait analyses as part of their  
31  
32 12 individualized clinical treatment plan. Another analysis will use cut-points for sedentary, light,  
33  
34 13 moderate, and vigorous activity for each of the three separate GMFCS levels(22) and then compare  
35  
36 14 sedentary behavior and PA levels of children and adolescents with CP with those of typically  
37  
38 15 developed children and adolescents. Finally, a qualitative study will be performed to explore the  
39  
40 16 daily life challenges that parents describe facing in their pursuit of helping their children with CP  
41  
42 17 live a physically active lifestyle. The methods and findings of this study will be reported elsewhere.  
43  
44  
45  
46

### 47 18 **Adverse events**

48  
49 19 Measuring habitual PA by accelerometry is a non-invasive method commonly used in research and  
50  
51 20 has no known risks or side effects, including pain or discomfort.  
52  
53  
54

55 21  
56  
57  
58  
59  
60

## PROTOCOL MANUSCRIPT

## 1 Patient and public involvement statement

2 A pilot study was conducted during the fall of 2019 in which five families were invited to  
3 participate and then give feedback on the questionnaires, the use of the accelerometer, and the  
4 overall burden of participation. Feedback from the children and adolescents, as well as from their  
5 parents, led to minor alterations of the study design, such as the questionnaire setup, the use of a  
6 different type of elastic belt as well as eliminating the use of an additional accelerometer worn on  
7 the thigh.

8 Patient user groups contributed to the assessment of the project prior to funding being granted by  
9 the Elsass Foundation and the Region of Southern Denmark.

10 Study results are expected to be disseminated through a national interest organization for persons  
11 with cerebral palsy (e.g., articles on website, oral presentation), ensuring study results are  
12 communicated to the participants and also to a general wider patient community.

## 13 Discussion

14 The present study will provide novel evidence of predictors of PA for children and adolescents with  
15 CP. Recruitment via secure digital post should increase recruitment efficiency, as eligible parties  
16 are invited to participate without dependency on health care attendances. Due to the wide inclusion  
17 criteria, results of this study are expected to have a high level of external validity and be  
18 generalizable to other children and adolescents with CP. To ensure the internal validity of the study,  
19 selection bias will be investigated through a non-responder analysis. A high acceptance by the  
20 treating health professionals is expected, as the majority of variables of interest are already  
21 implemented in CPUP.

## PROTOCOL MANUSCRIPT

1  
2  
3  
4 1 The study findings may be implemented in evidence-based PA guidelines, which are currently  
5  
6 2 lacking for children with cerebral palsy, thus providing health professionals with a clinical  
7  
8 3 instrument to help increase PA levels in children and adolescents with cerebral palsy.  
9  
10

#### 11 4 **Limitations**

12  
13  
14 5 This cohort study will be subject to some methodological limitations. Primarily, the current  
15  
16 6 predictive regression analysis cannot determine causality between the predictive variables and the  
17  
18 7 level of PA endured. Thus, the findings should optimally be validated in an external cohort and/or  
19  
20 8 verified in randomized controlled trails. External validation of the prediction model may be  
21  
22 9 achieved, for example, by using the Swedish CPUP registry data; however, this validation is not a  
23  
24 10 part of the current protocol. Nevertheless, bootstrap validation will be performed to increase  
25  
26 11 internal validation(38).  
27  
28  
29  
30

31 12 Using registry data supports clinically relevant data on all persons in the target group; however, it  
32  
33 13 also poses a risk of having data that is missing for unidentifiable reasons, which complicates the  
34  
35 14 handling of missing data. In this study, missing data will be addressed using imputation of the  
36  
37 15 missing values with the sample mean of the observed cases, resulting in a potential risk of biased  
38  
39 16 estimates due to variance of the variable may be underestimated.  
40  
41  
42

43 17 A possible 0-38 month time lag between variables collected via CPUP and the accelerometer data is  
44  
45 18 a methodology limitation. As the participants are at a developmental age where physical change can  
46  
47 19 be monumental, sensitivity analysis will be performed to evaluate the potential significance of the  
48  
49 20 time lag.  
50  
51  
52

53 21 To allow for comparability, data on sleep time, screen time and socio-economic status were  
54  
55 22 assessed using a questionnaire developed for assessment of typically developed children and  
56  
57  
58  
59  
60

## PROTOCOL MANUSCRIPT

1  
2  
3  
4  
5  
6  
7  
8  
9  
10  
11  
12  
13  
14  
15  
16  
17  
18  
19  
20  
21  
22  
23  
24  
25  
26  
27  
28  
29  
30  
31  
32  
33  
34  
35  
36  
37  
38  
39  
40  
41  
42  
43  
44  
45  
46  
47  
48  
49  
50  
51  
52  
53  
54  
55  
56  
57  
58  
59  
60

1 adolescents in Denmark(31). Data could have been strengthened by the use of validated  
2 questionnaires.

3 While the WHO definition of QOL is based on an individual's perception, proxy report by parents  
4 or caregivers is often necessary in the pediatric care setting due to a child's young age and/or  
5 limited ability to self-report(40). Although studies have shown that children and adolescents above  
6 the age of five are capable of self-reporting perceived quality of life independently(41), this study  
7 will use proxy evaluation due to the diverse cognitive abilities in the target group. Allowing for  
8 differentiated evaluation (proxy-reported or self-reported) would complicate comparability.

9 Although the study aims to cover a broad aspect of ICF components, important personal and  
10 environmental factors such as self-efficacy, social support, motivation, and physical access are not  
11 included in the analysis.

12 While children at GMFCS IV may walk assisted as a means of ambulation over short distances, or  
13 participate in active propulsion, neither level IV or V are included in this study as the use of  
14 wheelchairs complicate valid measurement of physical activity using accelerometer. Consequently,  
15 results of this study will not be applicable to children at a GMFCS level IV-V and thus hinders  
16 external validity.

17 Using tape as a means of mounting the accelerometers could potentially ensure slightly better data  
18 quality and possibly better wear compliance compared to using elastic bands(42). However,  
19 placement of the accelerometer with tape requires professional assistance, thus making the use of  
20 elastic belts a far more feasible solution. Additionally, elastic belts have been reported to be more  
21 comfortable for the user.

22 Using only one accelerometer instead of two limits the possibility of differentiating activity  
23 types(43). Furthermore, a hip worn accelerometer may exclude capturing upper-limb activities,

## PROTOCOL MANUSCRIPT

1 possibly resulting in an underestimation of physical activity levels. However, this study will only be  
2 using one accelerometer to ensure better wear compliance among the children and adolescents.

3 Recruitment of participants for this study will take place during the COVID-19 pandemic. To  
4 account for the possible impact this may have on the study, parents will be asked to evaluate the  
5 degree to which their child's physical activity level is affected by COVID-19 on a 5-point Likert  
6 scale ranging from "He/she is a lot less physically active now than before COVID-19" to "He/she is  
7 a lot more physically active now than before COVID-19." Furthermore, accelerometer data is only  
8 to be collected on days that represent everyday life, i.e., not quarantine days, holidays, or sick days.

## 9 **Conclusion**

10 The present protocol outlines a research project that will investigate predictors of habitual PA in  
11 children and adolescents with cerebral palsy with the perspective of optimizing PA levels and  
12 associated overall health, activities of daily living, and quality of life.

## 13 **Authors' contributions**

14 Conceptualization and design of the study: AHL, JT, JL, UDH & CEF. First draft of manuscript:  
15 CEF. Critical revision of manuscript for important intellectual content and approval of final version:  
16 all authors.

## 17 **Funding statement**

18 The project is funded by the Elsass Foundation, A.J.Andersen & Hustrus Fond, the Region of  
19 Southern Denmark, Familien Hede Nielsens Fond, Dagmar Marshalls Fond and A.P.Moellers Fond.  
20 These funding sources did not have a role in the design of this study and will not have any role  
21 during its execution, analyses, interpretation of the data, or decision to submit results.

## PROTOCOL MANUSCRIPT

1  
2  
3  
4  
5  
6  
7  
8  
9  
10  
11  
12  
13  
14  
15  
16  
17  
18  
19  
20  
21  
22  
23  
24  
25  
26  
27  
28  
29  
30  
31  
32  
33  
34  
35  
36  
37  
38  
39  
40  
41  
42  
43  
44  
45  
46  
47  
48  
49  
50  
51  
52  
53  
54  
55  
56  
57  
58  
59  
60

## 1 **Competing interests' statement**

2 The authors declare that they have no competing interests.

## 3 **Acknowledgments**

4 The authors would like to acknowledge Jan Brønd for his input on the use of accelerometers and  
5 data processing.

## 6 **Data availability statement**

7 Due to ethical and legal considerations, our data cannot be shared publicly. This is due to the  
8 restrictions from the Regional and the National Committee on Health Research Ethics and the  
9 General Data Protection Regulation (EU) 2016/679, since the data contains person-specific  
10 information on sex, birth date, and cerebral palsy classification among other.

11 Data are available for researchers who meet the criteria for access to confidential data. Access may  
12 be acquired through contact to the research group.

Peer review only

## PROTOCOL MANUSCRIPT

## References

1. Koman LA, Smith BP, Shilt JS. Cerebral palsy. *Lancet*. 2004;363(9421):1619-31.
2. Oskoui M, Coutinho F, Dykeman J, Jette N, Pringsheim T. An update on the prevalence of cerebral palsy: a systematic review and meta-analysis. *Dev Med Child Neurol*. 2013;55(6):509-19.
3. Frøslev-Friis C, Dunkhase-Heinl U, Andersen JD, Stausbøl-Grøn B, Hansen AV, Garne E. Epidemiology of cerebral palsy in Southern Denmark. *Danish medical journal*. 2015;62(1):A4990.
4. Bax M, Goldstein M, Rosenbaum P, Leviton A, Paneth N, Dan B, et al. Proposed definition and classification of cerebral palsy, April 2005. *Dev Med Child Neurol*. 2005;47(8):571-6.
5. Bell KJ, Ounpuu S, DeLuca PA, Romness MJ. Natural progression of gait in children with cerebral palsy. *J Pediatr Orthop*. 2002;22(5):677-82.
6. Global Recommendations on Physical Activity for Health. WHO Guidelines Approved by the Guidelines Review Committee. Geneva 2010.
7. Carlon SL, Taylor NF, Dodd KJ, Shields N. Differences in habitual physical activity levels of young people with cerebral palsy and their typically developing peers: a systematic review. *Disability and rehabilitation*. 2013;35(8):647-55.
8. Bjornson KF, Belza B, Kartin D, Logsdon R, McLaughlin JF. Ambulatory physical activity performance in youth with cerebral palsy and youth who are developing typically. *Phys Ther*. 2007;87(3):248-57.
9. Durstine JL, Painter P, Franklin BA, Morgan D, Pitetti KH, Roberts SO. Physical activity for the chronically ill and disabled. *Sports Med*. 2000;30(3):207-19.
10. Murray CJ, Vos T, Lozano R, Naghavi M, Flaxman AD, Michaud C, et al. Disability-adjusted life years (DALYs) for 291 diseases and injuries in 21 regions, 1990-2010: a systematic analysis for the Global Burden of Disease Study 2010. *Lancet*. 2012;380(9859):2197-223.
11. Morgan P, McGinley J. Gait function and decline in adults with cerebral palsy: a systematic review. *Disability and rehabilitation*. 2014;36(1):1-9.
12. Fowler EG, Kolobe TH, Damiano DL, Thorpe DE, Morgan DW, Brunstrom JE, et al. Promotion of physical fitness and prevention of secondary conditions for children with cerebral palsy: section on pediatrics research summit proceedings. *Phys Ther*. 2007;87(11):1495-510.
13. Strong WB, Malina RM, Blimkie CJ, Daniels SR, Dishman RK, Gutin B, et al. Evidence based physical activity for school-age youth. *J Pediatr*. 2005;146(6):732-7.
14. Rasmussen HM, Nordbye-Nielsen K, Moller-Madsen B, Johansen M, Ellitsgaard N, Pedersen CR, et al. The Danish Cerebral Palsy Follow-up Program. *Clin Epidemiol*. 2016;8:457-60.
15. Alriksson-Schmidt A, Hagglund G, Rodby-Bousquet E, Westbom L. Follow-up of individuals with cerebral palsy through the transition years and description of adult life: the Swedish experience. *J Pediatr Rehabil Med*. 2014;7(1):53-61.
16. SST. National Klinisk Retningslinje for fysioterapi/ergoterapi til børn med cerebral parese <https://sundhedsstyrelsen.dk/da/udgivelser/2014/nkr-cerebral-parese2014> [
17. Vandenberg JP, Elm Ev, Altman DG, Gøtzsche PC, Mulrow CD, Pocock SJ, et al. Strengthening the Reporting of Observational Studies in Epidemiology (STROBE): Explanation and Elaboration. *Annals of internal medicine*. 2007;147(8):W-163-W-94.
18. Harris PA, Taylor R, Thielke R, Payne J, Gonzalez N, Conde JG. Research electronic data capture (REDCap)--a metadata-driven methodology and workflow process for providing translational research informatics support. *J Biomed Inform*. 2009;42(2):377-81.
19. Arvidsson D, Fridolfsson J, Börjesson M. Measurement of physical activity in clinical practice using accelerometers. *Journal of Internal Medicine*. 2019;286(2):137-53.
20. Gorter JW, Noorduyt SG, Obeid J, Timmons BW. Accelerometry: A Feasible Method to Quantify Physical Activity in Ambulatory and Nonambulatory Adolescents with Cerebral Palsy. *International Journal of Pediatrics*. 2012;2012:6.



## PROTOCOL MANUSCRIPT

1  
2  
3  
4  
5  
6  
7  
8  
9  
10  
11  
12  
13  
14  
15  
16  
17  
18  
19  
20  
21  
22  
23  
24  
25  
26  
27  
28  
29  
30  
31  
32  
33  
34  
35  
36  
37  
38  
39  
40  
41  
42  
43  
44  
45  
46  
47  
48  
49  
50  
51  
52  
53  
54  
55  
56  
57  
58  
59  
60

21. Rasmussen MGB, Pedersen J, Olesen LG, Brage S, Klakk H, Kristensen PL, et al. Short-term efficacy of reducing screen media use on physical activity, sleep, and physiological stress in families with children aged 4–14: study protocol for the SCREENS randomized controlled trial. *BMC Public Health*. 2020;20(1):380.
22. Trost SG, Fragala-Pinkham M, Lennon N, O'Neil ME. Decision Trees for Detection of Activity Intensity in Youth with Cerebral Palsy. *Med Sci Sports Exerc*. 2016;48(5):958-66.
23. Ishikawa S, Kang M, Bjornson KF, Song K. Reliably measuring ambulatory activity levels of children and adolescents with cerebral palsy. *Arch Phys Med Rehabil*. 2013;94(1):132-7.
24. Cain KL, Sallis JF, Conway TL, Van Dyck D, Calhoun L. Using accelerometers in youth physical activity studies: a review of methods. *Journal of physical activity & health*. 2013;10(3):437-50.
25. Brond JC, Andersen LB, Arvidsson D. Generating ActiGraph Counts from Raw Acceleration Recorded by an Alternative Monitor. *Med Sci Sports Exerc*. 2017;49(11):2351-60.
26. Stahlhut M, Wong CTK, Taudorf K, Curtis D. Oversættelse af PedQL [in Danish]. *Fag Og Forskning*. 2010;March:4.
27. Carlon S, Shields N, Yong K, Gilmore R, Sakzewski L, Boyd R. A systematic review of the psychometric properties of Quality of Life measures for school aged children with cerebral palsy. *BMC Pediatrics*. 2010;10(1):81.
28. Varni JW, Burwinkle TM, Berrin SJ, Sherman SA, Artavia K, Malcarne VL. The PedsQL in pediatric cerebral palsy: reliability, validity, and sensitivity of the Generic Core Scales and Cerebral Palsy Module. *Dev Med Child Neurol*. 2006;48.
29. McCarthy ML, Silberstein CE, Atkins EA, Harryman SE, Sponseller PD, Hadley-Miller NA. Comparing reliability and validity of pediatric instruments for measuring health and well-being of children with spastic cerebral palsy. *Dev Med Child Neurol*. 2002;44(7):468-76.
30. Harvey A, Robin J, Morris ME, Graham HK, Baker R. A systematic review of measures of activity limitation for children with cerebral palsy. *Dev Med Child Neurol*. 2008;50(3):190-8.
31. Pedersen N, Koch S, Larsen K, Kristensen P, Troelsen J, Møller N, et al. Protocol for evaluating the impact of a national school policy on physical activity levels in Danish children and adolescents: the PHASAR study - a natural experiment. *BMC Public Health*. 2018;18.
32. Rasmussen HMea. CPOP Manual for Physiotherapy Protocol 2014 [updated 03.07.2014]. Available from: <http://www.cpop.dk/wp-content/uploads/2014.07.03-Fysioterapeut-manual.pdf>.
33. Graham HK, Harvey A, Rodda J, Nattrass GR, Pirpiris M. The Functional Mobility Scale (FMS). *J Pediatr Orthop*. 2004;24.
34. Rosenbaum P. Family and quality of life: key elements in intervention in children with cerebral palsy. *Dev Med Child Neurol*. 2011;53 Suppl 4:68-70.
35. McDougall J, Wright V, Rosenbaum P. The ICF model of functioning and disability: incorporating quality of life and human development. *Dev Neurorehabil*. 2010;13(3):204-11.
36. Shmueli G. To Explain or to Predict? *Statistical Science*. 2011;25.
37. Harrell FE. *Multivariable Modeling Strategies*. In: *Regression Modeling Strategies*. Springer Series in Statistics. New York, NY: Springer; 2001.
38. Austin PC, Steyerberg EW. Events per variable (EPV) and the relative performance of different strategies for estimating the out-of-sample validity of logistic regression models. *Stat Methods Med Res*. 2017;26(2):796-808.
39. Schomaker M, Heumann C. Bootstrap inference when using multiple imputation. *Stat Med*. 2018;37(14):2252-66.
40. Schiariti V, Klassen AF, Cieza A, Sauve K, O'Donnell M, Armstrong R, et al. Comparing contents of outcome measures in cerebral palsy using the International Classification of Functioning (ICF-CY): a systematic review. *Eur J Paediatr Neurol*. 2014;18(1):1-12.
41. Germain N, Aballéa S, Toumi M. Measuring the health-related quality of life in young children: how far have we come? *J Mark Access Health Policy*. 2019;7(1):1618661-.

## PROTOCOL MANUSCRIPT

- 1  
2  
3  
4 1 42. Schneller MB, Bentsen P, Nielsen G, Brond JC, Ried-Larsen M, Mygind E, et al. Measuring  
5 2 Children's Physical Activity: Compliance Using Skin-Taped Accelerometers. Med Sci Sports Exerc.  
6 3 2017;49(6):1261-9.  
7 4 43. Stewart T, Narayanan A, Hedayatrad L, Neville J, Mackay L, Duncan S. A Dual-Accelerometer  
8 5 System for Classifying Physical Activity in Children and Adults. Med Sci Sports Exerc. 2018;50(12):2595-602.  
9  
10  
11 6  
12  
13  
14  
15  
16  
17  
18  
19  
20  
21  
22  
23  
24  
25  
26  
27  
28  
29  
30  
31  
32  
33  
34  
35  
36  
37  
38  
39  
40  
41  
42  
43  
44  
45  
46  
47  
48  
49  
50  
51  
52  
53  
54  
55  
56  
57  
58  
59  
60

For peer review only

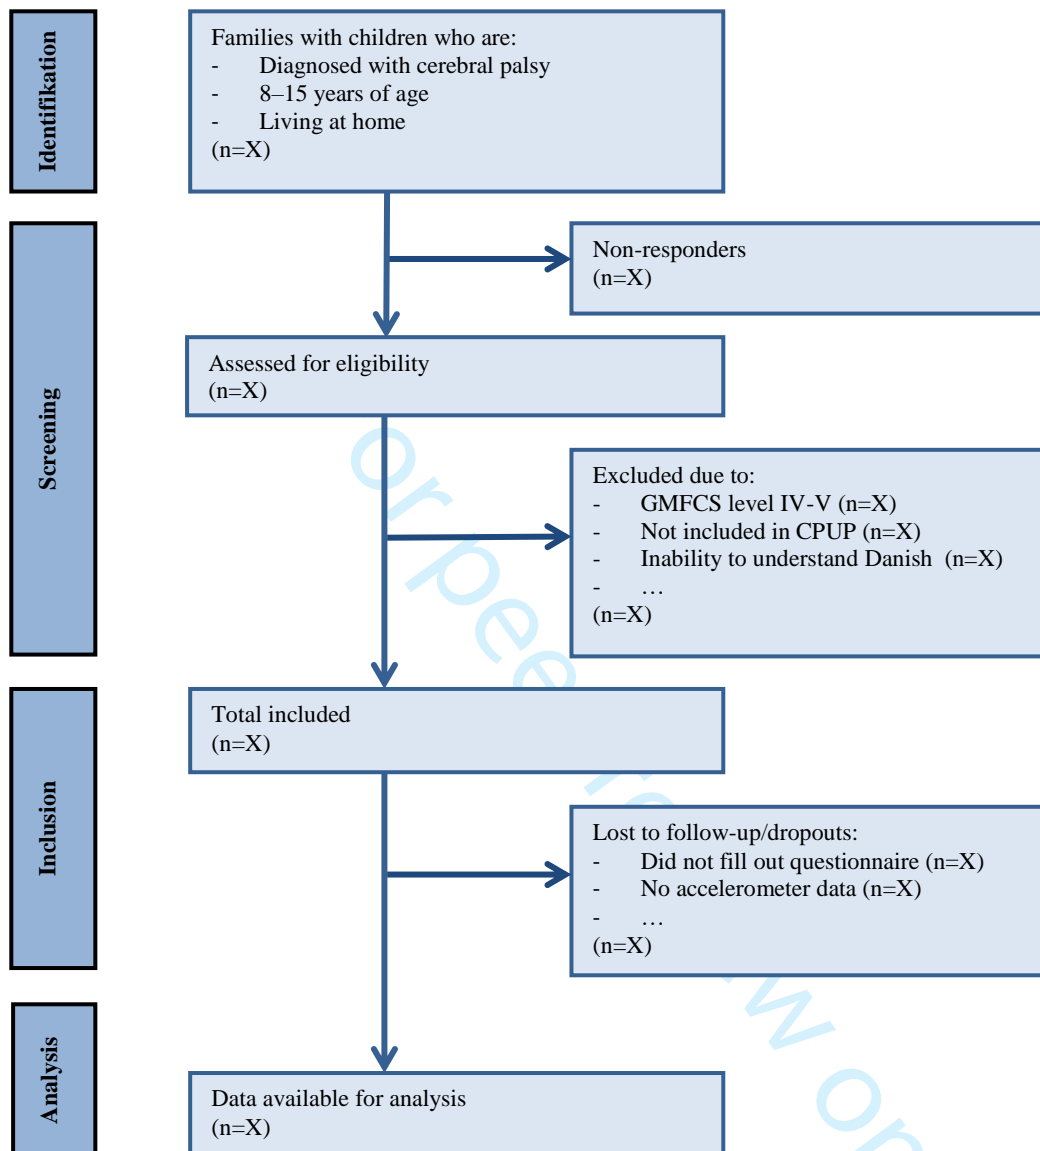

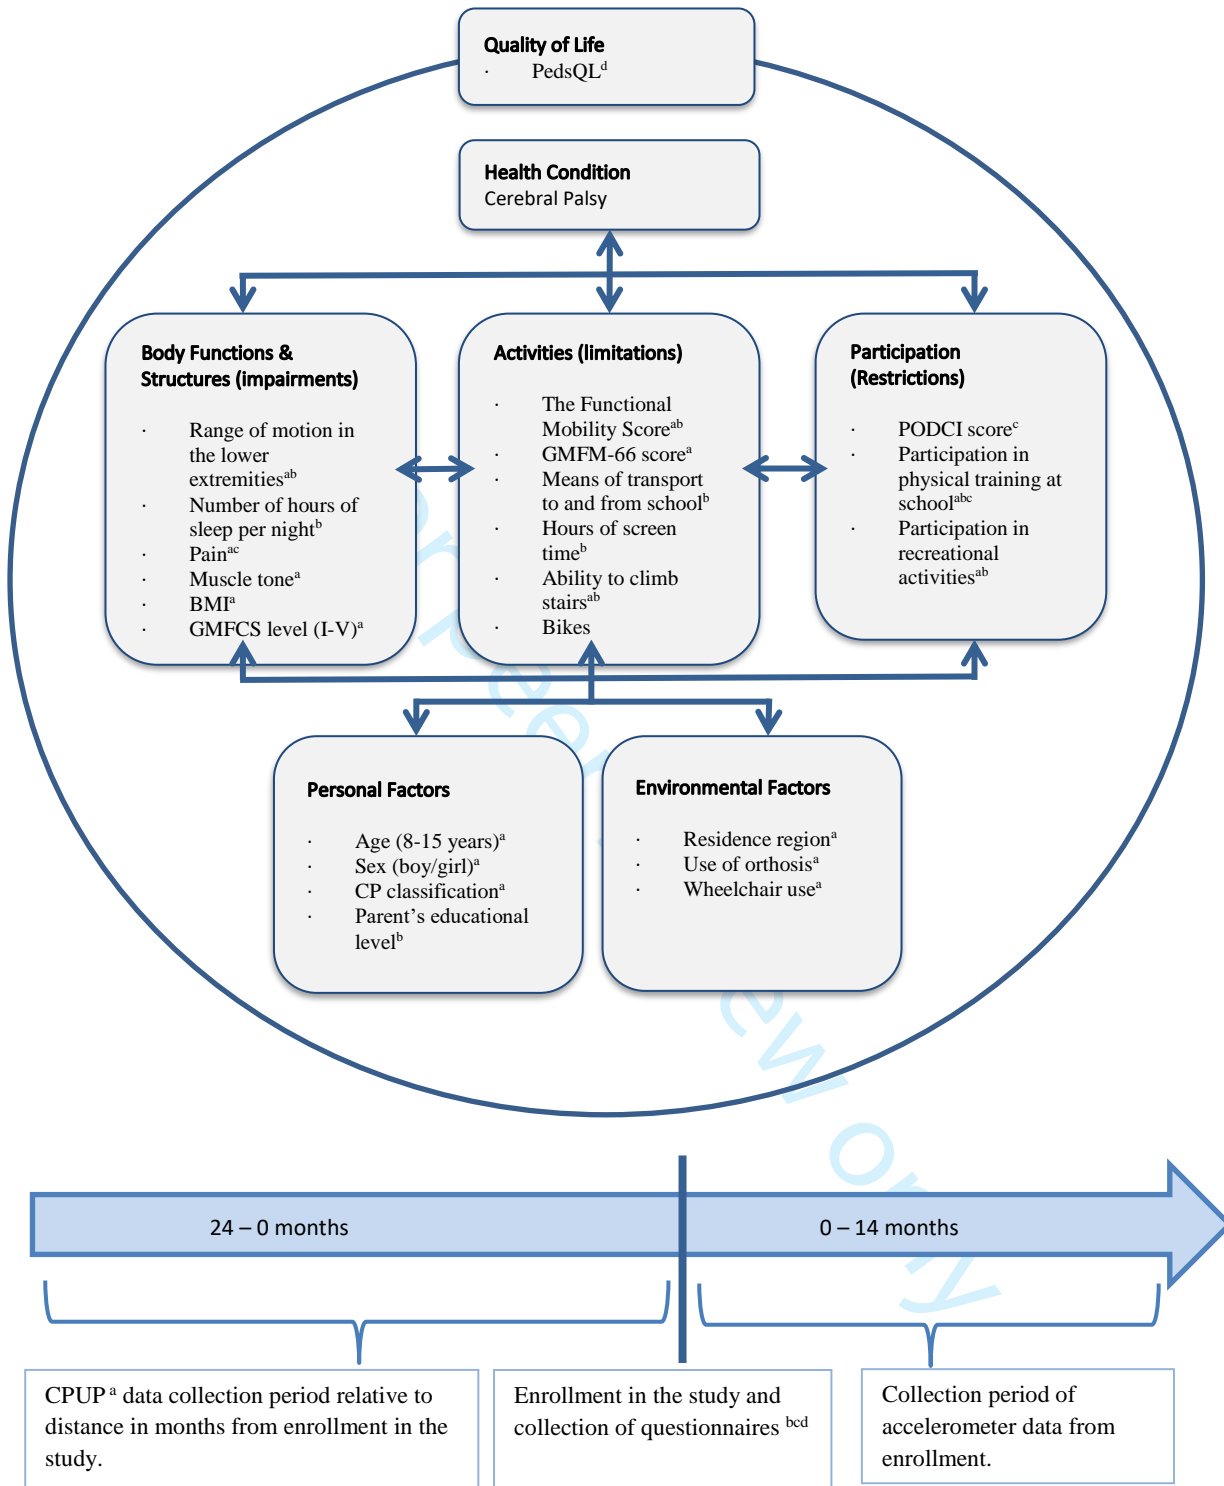

Variables derived from the following: <sup>a</sup>CPUP registry, <sup>b</sup>Parent reported questionnaire, <sup>c</sup>PODCI questionnaire, <sup>d</sup>PedsQL questionnaire

## Appendix – Parent-evaluated range of motion in the lower extremity

The appendix is an English version of the parent-evaluated range of motion assessment for the lower extremity with the purpose of evaluating whether parent-reported range of motion is an operational method of assessment. The parent-reported assessments are not intended to replace the CPUP range of motion values.

The parent is asked to evaluate range of motion on the most affected side, by stating whether the child's joint is capable of 'more' or 'less' movement than the depicted picture. The joint angle in the picture is the minimum range of motion considered acceptable according to the CPUP's physiotherapy protocol (1).

The following pictures depict movement in different lower extremity joints. Please only assess range of motion in the most affected limb (the limb with the greatest movement limitation)

Please note which leg is assessed:  RIGHT  LEFT

Each movement is illustrated with one picture. Based on the picture, please evaluate whether your child's joint is capable of 'more' or 'less' than depicted.

**Hip flexion** – the child is lying flat on his/her back, with the opposite leg stretched out on the floor. When you gently press the child's knee towards the stomach/chest, then

- The hip CANNOT reach the position in the picture before meeting resistance
- The hip can flex further (the knee is moved closer to the stomach/chest) than depicted.

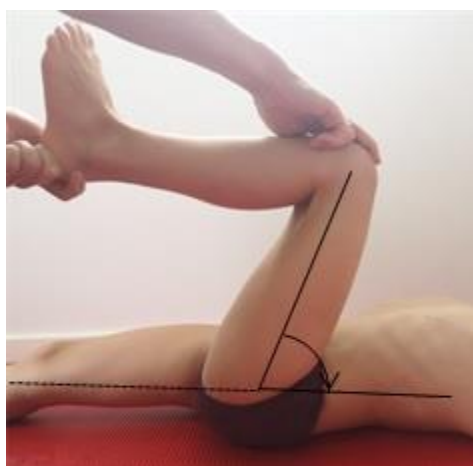

1  
2  
3  
4  
5  
6  
7  
8  
9 **Knee extension** – the child is lying flat on their back, with both legs stretched out. When you gently lift the  
10 child's foot from the surface, then

- 11  
12  The knee CANNOT reach the position in the picture  
13  
14  The knee can reach the position in the picture, or may even bend backward (hyperextend)  
15

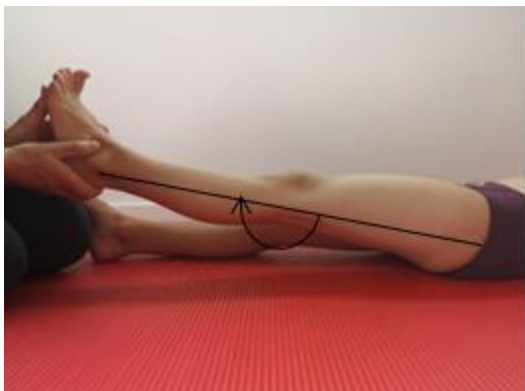

30  
31 **Popliteal angle** – have the child lay on his/her back on the floor with the opposite leg stretched out. Hold  
32 the leg to be assessed so that the thigh is pointing straight up towards the ceiling. In this position, extend  
33 the knee as much as possible before meeting resistance.

- 34  
35  
36  The knee CANNOT be extended as much as depicted  
37  
38  The knee can be extended just as much, or more, than depicted  
39

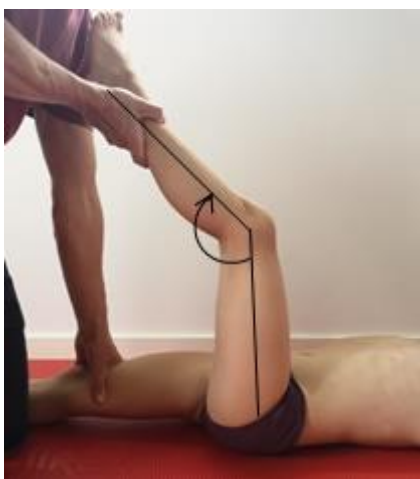

1  
2  
3  
4  
5  
6  
7  
8  
9  
10  
11  
12  
13  
14  
15  
16  
17  
18  
19  
20  
21  
22  
23  
24  
25  
26  
27  
28  
29  
30  
31  
32  
33  
34  
35  
36  
37  
38  
39  
40  
41  
42  
43  
44  
45  
46  
47  
48  
49  
50  
51  
52  
53  
54  
55  
56  
57  
58  
59  
60

---

**Flexion of the ankle with an extended knee** – have the child lay flat on his/her back with the opposite leg stretched out. Press against the sole of the foot with one hand

- The foot CANNOT be pressed towards the shin as depicted
- The foot can be pressed towards the shin as depicted, or further.

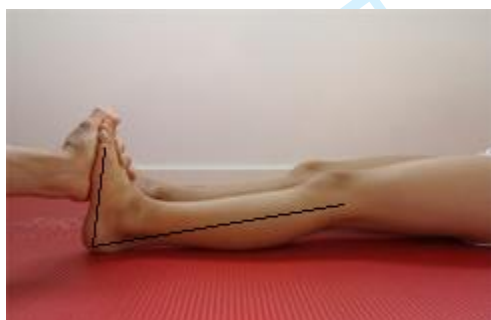

---

**Flexion of the ankle with a flexed knee** – have the child lay flat on his/her back with the opposite leg extended. The test leg flexed 90 degrees in the hip and in the knee (see picture). Press against the sole of the foot with one hand, and hold back on the child's thigh with the other hand.

- The foot CANNOT be pressed towards the shin as depicted
- The foot can be pressed towards the shin as depicted, or further.

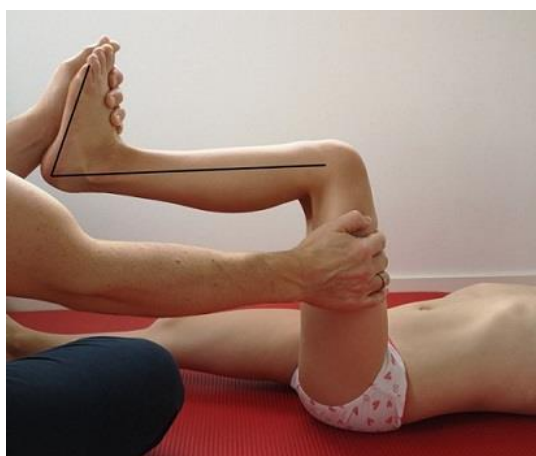

---

1. Rasmussen HMea. CPOP Manual for Physiotherapy Protocol 2014 [updated 03.07.2014]. Available from: <http://www.cpop.dk/wp-content/uploads/2014.07.03-Fysioterapeut-manual.pdf>.

STROBE Statement—Checklist of items that should be included in reports of *cohort studies*

|                              | Item No | Recommendation                                                                                                                                                                                    | Page            |
|------------------------------|---------|---------------------------------------------------------------------------------------------------------------------------------------------------------------------------------------------------|-----------------|
| <b>Title and abstract</b>    | 1       | (a) Indicate the study's design with a commonly used term in the title or the abstract                                                                                                            | 1               |
|                              |         | (b) Provide in the abstract an informative and balanced summary of what was done and what was found                                                                                               | 2-3             |
| <b>Introduction</b>          |         |                                                                                                                                                                                                   |                 |
| Background/rationale         | 2       | Explain the scientific background and rationale for the investigation being reported                                                                                                              | 4-6             |
| Objectives                   | 3       | State specific objectives, including any prespecified hypotheses                                                                                                                                  | 6               |
| <b>Methods</b>               |         |                                                                                                                                                                                                   |                 |
| Study design                 | 4       | Present key elements of study design early in the paper                                                                                                                                           | 6               |
| Setting                      | 5       | Describe the setting, locations, and relevant dates, including periods of recruitment, exposure, follow-up, and data collection                                                                   | 7               |
| Participants                 | 6       | (a) Give the eligibility criteria, and the sources and methods of selection of participants. Describe methods of follow-up                                                                        | 7-8             |
|                              |         | (b) For matched studies, give matching criteria and number of exposed and unexposed                                                                                                               | -               |
| Variables                    | 7       | Clearly define all outcomes, exposures, predictors, potential confounders, and effect modifiers. Give diagnostic criteria, if applicable                                                          | 8-12            |
| Data sources/<br>measurement | 8*      | For each variable of interest, give sources of data and details of methods of assessment (measurement). Describe comparability of assessment methods if there is more than one group              | 8               |
| Bias                         | 9       | Describe any efforts to address potential sources of bias                                                                                                                                         | 17-19           |
| Study size                   | 10      | Explain how the study size was arrived at                                                                                                                                                         | 7               |
| Quantitative variables       | 11      | Explain how quantitative variables were handled in the analyses. If applicable, describe which groupings were chosen and why                                                                      | 12-13,<br>17-18 |
| Statistical methods          | 12      | (a) Describe all statistical methods, including those used to control for confounding                                                                                                             | 12-13,<br>17-18 |
|                              |         | (b) Describe any methods used to examine subgroups and interactions                                                                                                                               | 17-18           |
|                              |         | (c) Explain how missing data were addressed                                                                                                                                                       | 17-18           |
|                              |         | (d) If applicable, explain how loss to follow-up was addressed                                                                                                                                    | -               |
|                              |         | (e) Describe any sensitivity analyses                                                                                                                                                             | -               |
| <b>Results</b>               |         |                                                                                                                                                                                                   |                 |
| Participants                 | 13*     | (a) Report numbers of individuals at each stage of study—eg numbers potentially eligible, examined for eligibility, confirmed eligible, included in the study, completing follow-up, and analysed | Fig 1           |
|                              |         | (b) Give reasons for non-participation at each stage                                                                                                                                              | Fig 1           |
|                              |         | (c) Consider use of a flow diagram                                                                                                                                                                | Fig 1           |
| Descriptive data             | 14*     | (a) Give characteristics of study participants (eg demographic, clinical, social) and information on exposures and potential confounders                                                          | -               |
|                              |         | (b) Indicate number of participants with missing data for each variable of interest                                                                                                               | -               |
|                              |         | (c) Summarise follow-up time (eg, average and total amount)                                                                                                                                       | Fig 2           |
| Outcome data                 | 15*     | Report numbers of outcome events or summary measures over time                                                                                                                                    | -               |
| Main results                 | 16      | (a) Give unadjusted estimates and, if applicable, confounder-adjusted                                                                                                                             | -               |



|                          |    |                                                                                                                                                                            |       |
|--------------------------|----|----------------------------------------------------------------------------------------------------------------------------------------------------------------------------|-------|
|                          |    | estimates and their precision (eg, 95% confidence interval). Make clear which confounders were adjusted for and why they were included                                     |       |
|                          |    | (b) Report category boundaries when continuous variables were categorized                                                                                                  | -     |
|                          |    | (c) If relevant, consider translating estimates of relative risk into absolute risk for a meaningful time period                                                           | -     |
| Other analyses           | 17 | Report other analyses done—eg analyses of subgroups and interactions, and sensitivity analyses                                                                             | -     |
| <b>Discussion</b>        |    |                                                                                                                                                                            |       |
| Key results              | 18 | Summarise key results with reference to study objectives                                                                                                                   | 19    |
| Limitations              | 19 | Discuss limitations of the study, taking into account sources of potential bias or imprecision. Discuss both direction and magnitude of any potential bias                 | 20-22 |
| Interpretation           | 20 | Give a cautious overall interpretation of results considering objectives, limitations, multiplicity of analyses, results from similar studies, and other relevant evidence | -     |
| Generalisability         | 21 | Discuss the generalisability (external validity) of the study results                                                                                                      | 19    |
| <b>Other information</b> |    |                                                                                                                                                                            |       |
| Funding                  | 22 | Give the source of funding and the role of the funders for the present study and, if applicable, for the original study on which the present article is based              | 22    |

\*Give information separately for exposed and unexposed groups.

**Note:** An Explanation and Elaboration article discusses each checklist item and gives methodological background and published examples of transparent reporting. The STROBE checklist is best used in conjunction with this article (freely available on the Web sites of PLoS Medicine at <http://www.plosmedicine.org/>, Annals of Internal Medicine at <http://www.annals.org/>, and Epidemiology at <http://www.epidem.com/>). Information on the STROBE Initiative is available at <http://www.strobe-statement.org>.
